# Supplementary material for: Hypertensive disorders of pregnancy and risk of asthma in offspring: protocol for a systematic review and meta-analysis
Source: PubMed Central journal article supplement — BMJ Open. 2020 Apr 9;10(4):e035145. doi: 10.1136/bmjopen-2019-035145 (PMC7170635; doi:10.1136/bmjopen-2019-035145), 2020-04-09
Supplement: bmjopen-2019-035145.draft_revisions.pdf [file bmjopen-2019-035145.draft_revisions.pdf]

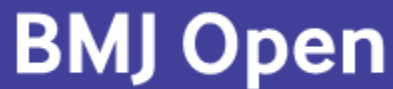

BMJ Open is committed to open peer review. As part of this commitment we make the peer review history of every article we publish publicly available.

When an article is published we post the peer reviewers' comments and the authors' responses online. We also post the versions of the paper that were used during peer review. These are the versions that the peer review comments apply to.

The versions of the paper that follow are the versions that were submitted during the peer review process. They are not the versions of record or the final published versions. They should not be cited or distributed as the published version of this manuscript.

BMJ Open is an open access journal and the full, final, typeset and author-corrected version of record of the manuscript is available on our site with no access controls, subscription charges or pay-per-view fees (<http://bmjopen.bmj.com>).

If you have any questions on BMJ Open's open peer review process please email [info.bmjopen@bmj.com](mailto:info.bmjopen@bmj.com)

# BMJ Open

## Hypertensive Disorders of Pregnancy and Risk of Asthma in Offspring: A Systematic Review and Meta-Analysis

|                               |                                                                                                                                                                                                                                                                                                                                                                                                                                                                                                                                                                                                                                                                        |
|-------------------------------|------------------------------------------------------------------------------------------------------------------------------------------------------------------------------------------------------------------------------------------------------------------------------------------------------------------------------------------------------------------------------------------------------------------------------------------------------------------------------------------------------------------------------------------------------------------------------------------------------------------------------------------------------------------------|
| Journal:                      | <i>BMJ Open</i>                                                                                                                                                                                                                                                                                                                                                                                                                                                                                                                                                                                                                                                        |
| Manuscript ID                 | bmjopen-2019-035145                                                                                                                                                                                                                                                                                                                                                                                                                                                                                                                                                                                                                                                    |
| Article Type:                 | Protocol                                                                                                                                                                                                                                                                                                                                                                                                                                                                                                                                                                                                                                                               |
| Date Submitted by the Author: | 20-Oct-2019                                                                                                                                                                                                                                                                                                                                                                                                                                                                                                                                                                                                                                                            |
| Complete List of Authors:     | Li, Ping; West China Second University Hospital, Sichuan University, Department of Pediatrics; Key Laboratory of Birth Defects and Related Diseases of Women and Children (Sichuan University) Ministry of Education<br>Xiong, tao; West China Second University Hospital, Sichuan University, Department of Pediatrics; Key Laboratory of Birth Defects and Related Diseases of Women and Children (Sichuan University) Ministry of Education<br>Hu, Yong; West China Second University Hospital, Sichuan University, Department of Pediatrics; Key Laboratory of Birth Defects and Related Diseases of Women and Children (Sichuan University) Ministry of Education |
| Keywords:                     | Asthma < THORACIC MEDICINE, Hypertension < CARDIOLOGY, PERINATOLOGY, PAEDIATRICS, Community child health < PAEDIATRICS                                                                                                                                                                                                                                                                                                                                                                                                                                                                                                                                                 |
|                               |                                                                                                                                                                                                                                                                                                                                                                                                                                                                                                                                                                                                                                                                        |

SCHOLARONE™  
Manuscripts

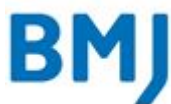

I, the Submitting Author has the right to grant and does grant on behalf of all authors of the Work (as defined in the below author licence), an exclusive licence and/or a non-exclusive licence for contributions from authors who are: i) UK Crown employees; ii) where BMJ has agreed a CC-BY licence shall apply, and/or iii) in accordance with the terms applicable for US Federal Government officers or employees acting as part of their official duties; on a worldwide, perpetual, irrevocable, royalty-free basis to BMJ Publishing Group Ltd ("BMJ") its licensees and where the relevant Journal is co-owned by BMJ to the co-owners of the Journal, to publish the Work in this journal and any other BMJ products and to exploit all rights, as set out in our [licence](#).

The Submitting Author accepts and understands that any supply made under these terms is made by BMJ to the Submitting Author unless you are acting as an employee on behalf of your employer or a postgraduate student of an affiliated institution which is paying any applicable article publishing charge ("APC") for Open Access articles. Where the Submitting Author wishes to make the Work available on an Open Access basis (and intends to pay the relevant APC), the terms of reuse of such Open Access shall be governed by a Creative Commons licence – details of these licences and which [Creative Commons](#) licence will apply to this Work are set out in our licence referred to above.

Other than as permitted in any relevant BMJ Author's Self Archiving Policies, I confirm this Work has not been accepted for publication elsewhere, is not being considered for publication elsewhere and does not duplicate material already published. I confirm all authors consent to publication of this Work and authorise the granting of this licence.

# Hypertensive Disorders of Pregnancy and Risk of Asthma in Offspring: A Systematic Review and Meta-Analysis

Ping Li, MD,<sup>1,2</sup> Tao Xiong\*, MD PhD<sup>1,2,3</sup> Yong Hu, MD<sup>1,2</sup>

<sup>1</sup> Department of Pediatrics, West China Second University Hospital, Sichuan University, Chengdu, China

<sup>2</sup> Key Laboratory of Birth Defects and Related Diseases of Women and Children (Sichuan University) Ministry of Education

<sup>3</sup> Deep Underground Space Medical Center, West China Hospital, Sichuan University, Chengdu, China

Ping Li: [liping\\_371986@163.com](mailto:liping_371986@163.com)

Yong Hu: [huyong1003@163.com](mailto:huyong1003@163.com)

## Funding

This work is supported by the National Science Foundation of China (No. 81300525 to Tao Xiong, No. 81701540 to Ping Li), Deep Underground Space Medical Center (No. DUGM201809 to Tao Xiong), and the Fundamental Research Funds for the Central Universities (to Tao Xiong).

## \*Correspondence

Dr. Tao Xiong No. 20, Section Three, South Renmin Road, Chengdu, China

Tel: 1-5126616986

Email: [tao\\_xiong@126.com](mailto:tao_xiong@126.com)

Word count: 2168

1  
2  
3  
4  
5  
6  
7  
8  
9  
10  
11  
12  
13  
14  
15  
16  
17  
18  
19  
20  
21  
22  
23  
24  
25  
26  
27  
28  
29  
30  
31  
32  
33  
34  
35  
36  
37  
38  
39  
40  
41  
42  
43  
44  
45  
46  
47  
48  
49  
50  
51  
52  
53  
54  
55  
56  
57  
58  
59  
60

24     **Abstract**

25     **Introduction:** Hypertensive disorders of pregnancy (HDP), as one of the most  
26     common obstetrical complications, has been reported to have a controversial  
27     relationship with an increased risk of asthma in offspring. No systematic review has  
28     been performed on this topic. The aim of this systematic review is to summarize the  
29     available evidence examining the association between HDP and the risk of asthma in  
30     offspring.

31     **Methods and analysis:** We will follow the Preferred Reporting Items for Systematic  
32     Reviews and Meta-Analyses (PRISMA) and Meta-analysis of Observational Studies  
33     in Epidemiology (MOOSE) guidelines. A systematic search of the PubMed,  
34     EMBASE, Cochrane and Web of Science databases will be performed using a  
35     detailed search strategy. Cohort, case-control and cross-sectional studies that report a  
36     diagnosis of maternal HDP and asthma in offspring will be included. Studies will be  
37     limited to the English language and include only human participants. Two  
38     independent reviewers will conduct the study selection, data extraction, and risk of  
39     bias assessments using a standardized data extraction form. A meta-analysis will be  
40     performed to calculate overall pooled estimates using the generic inverse variance  
41     method. The data will be synthesized by either fixed-effect or random effects models  
42     according to heterogeneity tests. All analyses will be performed in STATA 14 and  
43     RevMan5.3. High-quality evidence of the relationship between HDP and the risk of  
44     asthma in exposed offspring will be confirmed based on the synthesis of current  
45     studies. In addition, the results of subgroup analyses and related secondary outcomes

will be reported. The following will be concluded: (i) whether HDP increases the risk of asthma in offspring; (ii) whether HDP affects the severity of asthma in exposed offspring; and (iii) whether possible differences in the risk of asthma among different HDP subgroups exist.

50

**Keywords:** Asthma, Hypertension, Perinatology, Paediatrics, Community child health

53

## 54 **Ethics and Dissemination**

There is no requirement for ethics approval because the meta-analysis and systematic review are based on published data. It is anticipated that the dissemination of results will take place at conferences and through publication in a peer-reviewed journal.

58

## 59 **Strengths and limitations of this study**

- 60 ➤ This will be the first meta-analysis to explore the relationship between HDP and  
61 the risk of asthma in exposed offspring.
- 62 ➤ This protocol was designed following the Preferred Reporting Items for  
63 Systematic Reviews and Meta-Analyses (PRISMA) and Meta-analysis of  
64 Observational Studies in Epidemiology (MOOSE) guidelines.

1  
2  
3  
4  
5  
6  
7  
8  
9  
10  
11  
12  
13  
14  
15  
16  
17  
18  
19  
20  
21  
22  
23  
24  
25  
26  
27  
28  
29  
30  
31  
32  
33  
34  
35  
36  
37  
38  
39  
40  
41  
42  
43  
44  
45  
46  
47  
48  
49  
50  
51  
52  
53  
54  
55  
56  
57  
58  
59  
60

- 65 ➤ Selection, data extraction and risk of bias assessments will be performed by two
- 66 independent reviewers.
- 67 ➤ The supporting evidence may promote strengthened surveillance of
- 68 HDP-exposed infants, leading to early identification and intervention, finally
- 69 improving lung function and asthma outcomes.
- 70 ➤ Since the positive results are more prone to be published online, leading
- 71 to potential publication bias, the funnel plots will be used to assess
- 72 publication bias.

## 73 INTRODUCTION

74 Hypertensive disorders of pregnancy (HDP) is estimated to affect 5% to 15% of all  
75 pregnancies and is recognized as one of the most common obstetrical complications <sup>1</sup>  
76 <sup>2</sup>. HDP includes any hypertensive condition before gestation or with manifestation  
77 before 20 weeks and hypertension starting at or after 20 weeks; types of hypertension  
78 include gestational hypertension (GH), preeclampsia (PE), chronic hypertension, and  
79 PE superimposed on chronic hypertension, according to the International Society for  
80 the Study of Hypertension in Pregnancy <sup>3</sup>. Recent research has reported that HDP is  
81 closely associated with an increased risk of diseases in offspring, including asthma,  
82 allergy, eczema <sup>4</sup>, high blood pressure <sup>5</sup>, congenital heart defects <sup>6</sup>, obesity <sup>7</sup>, autism  
83 spectrum disorder (ASD), attention-deficit/hyperactivity disorder (ADHD), low  
84 cognitive function, anxiety/depression, and other neurodevelopmental disorders <sup>8 9</sup>.  
85 The “Developmental Origins of Health and Disease (DOHaD)” hypothesis, which has  
86 been widely proven, has revealed that fetuses exposed to adverse uterine  
87 environments are prone to develop chronic noncommunicable diseases later in life,  
88 owing to the perpetual alteration of the fetal vasculature, cardiac structure, pancreas,  
89 adipose tissue and brain structure <sup>10 11</sup>. In addition, HDP induces a detrimental in utero  
90 environment, with systemic inflammation and oxidative stress experienced by the  
91 fetus, thus impairing vulnerable fetal lung development and disturbing immune  
92 function, which may persist throughout life in offspring.

93 Asthma, a common lung disease associated with abnormal inflammation and  
94 immune response, is characterized by variable symptoms of wheezing, shortness of

1  
2  
3  
4  
5  
6  
7  
8  
9  
10  
11  
12  
13  
14  
15  
16  
17  
18  
19  
20  
21  
22  
23  
24  
25  
26  
27  
28  
29  
30  
31  
32  
33  
34  
35  
36  
37  
38  
39  
40  
41  
42  
43  
44  
45  
46  
47  
48  
49  
50  
51  
52  
53  
54  
55  
56  
57  
58  
59  
60

breath, chest tightness and/or cough, and by variable expiratory airflow limitation. It is the most common chronic disease of childhood responsible for school absences, emergency department visits and hospitalizations. Thus, asthma has been regarded as a major public health challenge worldwide, affecting 1-18% of populations in different countries <sup>12 13</sup>. The development of asthma has generally been attributed to the interactions of genetics and environmental factors <sup>14 15</sup>. Currently, it is widely accepted that asthma develops early in life <sup>16</sup>. Recurrent wheezing and other asthma-like symptoms usually begin as early as the first few weeks or months after birth. There is growing evidence that negative events occurring early in life, even in the perinatal period, significantly increase the risk of asthma and poor lung function later in life <sup>17 18</sup>. Hence, adverse obstetrical events, such as HDP, may have strong effects on fetal airway structure, lung and immune system development during the prenatal period and may significantly increase the susceptibility of offspring to asthma <sup>19 20</sup>.

Approximately half of individuals with asthma are reported to suffer from asthma-like symptoms during childhood <sup>21</sup>. Therefore, early recognition and intervention is critical to reduce short- and long-term morbidity and to prevent potential long-term sequelae resulting in impaired lung function. Recent studies have shown that HDP is a potential risk factor for childhood asthma in offspring <sup>4 22</sup>. However, the association between HDP and asthma is controversial <sup>23</sup>. Identifying the relationship between HDP and asthma could help us to understand the pathogenesis of asthma. It also facilitates early asthma recognition and intervention in high-risk

117 populations. Therefore, we aim to perform a systematic review and meta-analysis to  
118 summarize the available evidence regarding the relationship between HDP and  
119 asthma in offspring.

## 121 **OBJECTIVES**

122 The aim of the present systematic review and meta-analysis is to summarize the  
123 available evidence to explore the following:

- 124 1. Whether HDP increases the risk of asthma in offspring;
- 125 2. Whether HDP affects the severity of asthma in the exposed offspring;
- 126 3. Whether differences in the risk of asthma among different HDP subgroups exist.

127 The study will be conducted based on the following requirements.

## 128 **Population**

129 Pregnant women and their offspring will be included.

## 130 **Intervention/exposures**

131 HDP, defined as any hypertension (systolic blood pressure (BP)  $\geq 140$  and/or diastolic  
132 BP  $\geq 90$  mmHg) during pregnancy, mainly includes the following:

- 133 (1) Gestational hypertension (GH): any hypertensive disorder that develops at or  
134 after 20 weeks of gestation in the absence of features of preeclampsia (PE);
- 135 (2) PE: GH accompanied by one or more of the following new-onset conditions at or  
136 after 20 weeks of gestation: (i) proteinuria, (ii) other maternal organ dysfunction, such

1  
2  
3  
4  
5  
6  
7  
8  
9  
10  
11  
12  
13  
14  
15  
16  
17  
18  
19  
20  
21  
22  
23  
24  
25  
26  
27  
28  
29  
30  
31  
32  
33  
34  
35  
36  
37  
38  
39  
40  
41  
42  
43  
44  
45  
46  
47  
48  
49  
50  
51  
52  
53  
54  
55  
56  
57  
58  
59  
60

as acute kidney injury, liver involvement, neurological complications, hematological complications, and (iii) uteroplacental dysfunction;

(3) Chronic hypertension (essential and secondary): high blood pressure predating pregnancy or recognized at < 20 weeks of gestation;

(4) PE superimposed on chronic hypertension: chronic essential hypertension accompanied by any of the above maternal organ dysfunctions consistent with PE.

The definitions were developed according to current guidelines, such as the Canadian Hypertensive Disorders of Pregnancy Working Group <sup>24</sup>, Society of Obstetric Medicine of Australia and New Zealand <sup>25</sup>, American College of Obstetricians and Gynecologists <sup>3</sup>, and International Society for the Study of Hypertension in Pregnancy guidelines <sup>26</sup>.

**Comparison**

Normotensive pregnant women will be used as the control group.

**Outcomes**

1. Primary outcome: asthma.

Asthma is defined by a history of respiratory symptoms including wheezing, shortness of breath, chest tightness and cough that vary over time and in intensity together with variable expiratory airflow limitation, according to the Global Initiative for Asthma (GINA) <sup>12</sup> and International Collaboration in Asthma, Allergy and Immunology (iCAALL)<sup>27</sup>.

## 2. Secondary outcomes:

(1) Wheezing/recurrent wheezing;

(2) Lung/pulmonary function (including forced expiratory volume in the first second [FEV<sub>1</sub>], forced expiratory volume at 0.5 seconds [FEV<sub>0.5</sub>], forced vital capacity [FVC], FEV<sub>1</sub>/FVC, 50% of the forced expiratory flow [FEF<sub>50</sub>] and 75% of the forced expiratory flow [FEF<sub>75</sub>], maximal midexpiratory flow [FEF<sub>25-75</sub>]), active asthma, asthma exacerbations and asthma treatment (including hospitalization, systemic corticosteroid use, inhaled  $\beta_2$ -agonist use, inhaled corticosteroid [ICS] use, combination of inhaled  $\beta_2$ -agonists and corticosteroid use, leukotriene antagonists use, and other prescriptions for antiasthma medications);

3. Serum IgE levels.

## METHODS

The systematic review and meta-analysis will follow the Preferred Reporting Items for Systematic Reviews and Meta-Analysis (PRISMA)<sup>28</sup> and Meta-analysis of Observational Studies in Epidemiology (MOOSE) guidelines<sup>29</sup>.

### Criteria for considering studies for review

#### Inclusion criteria

(1) Studies with a cohort, case-control or cross-sectional design that report a diagnosis of HDP and asthma in offspring as the outcomes of interest;

(2) Studies that estimate the relationship between HDP and asthma and report the

1  
2  
3  
4  
5  
6  
7  
8  
9  
10  
11  
12  
13  
14  
15  
16  
17  
18  
19  
20  
21  
22  
23  
24  
25  
26  
27  
28  
29  
30  
31  
32  
33  
34  
35  
36  
37  
38  
39  
40  
41  
42  
43  
44  
45  
46  
47  
48  
49  
50  
51  
52  
53  
54  
55  
56  
57  
58  
59  
60

- estimated risks (odds ratios [ORs] or relative risks [RRs]) with 95% confidence intervals (CIs) or provide sufficient information to calculate these values;
- (3) Studies published in only the English language;
- (4) Studies published in any year;
- (5) Studies that include only humans.

**Exclusion criteria**

- (1) Conference abstracts, letters to editors, reviews and commentary articles;
- (2) Studies with overlapping data;
- (3) Studies missing raw data.

**Search strategy**

A systematic search of the literature will be conducted in the following electronic databases: PubMed, EMBASE, Cochrane and Web of Science. We will search databases such as Google Scholar for gray literature. A three-phase search strategy will be applied in this review.

1. For HDP, the following combination of search terms will be used: “hypertensive disorders during pregnancy” or “hypertensive disorders in pregnancy” or “hypertensive disorders of pregnancy” or “pregnancy-induced hypertension” or “eclampsia” or “preeclampsia” or “preeclampsia” or “preeclamptic pregnancy” or “chronic hypertension” or “gestational hypertension” or “chronic hypertension with

200 superimposed preeclampsia” or “postpartum hypertension” or “maternal hypertensive  
201 disorders”.

202 2. For asthma, the following search terms will be used: “asthma” or “wheeze” or  
203 “wheezing” or “shortness of breath” or “bronchial spasm” or “bronchospasm” or  
204 “bronchoconstriction” or “bronchoconstrict” or “bronchial hyperreactivity” or  
205 “bronchial hyperresponsiveness” or “reactive airway disease” or “obstructive lung  
206 disease” or “air low limitation” or “chronic obstructive respiratory disorder” or  
207 “chronic obstructive pulmonary disease”.

208 3. We will combine steps 1 and 2 with “and”.

209 The detailed search strategy is listed in the Supplement 1. We will manually search  
210 the reference lists of the included studies to further identify eligible studies.

211

## 212 **Study selection and data extraction**

213 The eligibility of each study will be assessed independently by two investigators (PL  
214 and TX) and disagreements will be solved by discussion (with a third author, YH,  
215 when necessary). Data from the identified studies will be extracted using a  
216 standardized data extraction form listed in the Supplement 2. The titles and abstracts  
217 of the studies retrieved from each database will be stored and managed in EndNote  
218 reference manager. For each included study, we will extract the following information:  
219 first author’s last name, year of publication, study location, study design, sample size,

1  
2  
3  
4  
5  
6  
7  
8  
9  
10  
11  
12  
13  
14  
15  
16  
17  
18  
19  
20  
21  
22  
23  
24  
25  
26  
27  
28  
29  
30  
31  
32  
33  
34  
35  
36  
37  
38  
39  
40  
41  
42  
43  
44  
45  
46  
47  
48  
49  
50  
51  
52  
53  
54  
55  
56  
57  
58  
59  
60

ascertainment of exposure (HDP and its subgroups), outcome diagnostic criteria, offspring age at diagnosis, adjusted/matched confounding variables and effect estimates (RRs or ORs) with 95% CIs. The eligibility of each study will be assessed independently by two investigators (PL and TX) and disagreements will be solved by discussion (with a third author, YH, when necessary).

**Subgroups /subsets**

Subgroup analyses will be carried out according to the following: (1) study design (cohort vs. case-control vs. cross-sectional), (2) sample size, (3) location (e.g., Europe vs. United States), (4) income level of the country (low/middle/high), (5) year of publication, (6) study subject selection, (7) study quality (minimal/low vs. moderate/high), (8) child adjusted factors (e.g., age at diagnosis of asthma, sex, birth weight, gestational age), and (9) maternal adjusted factors (e.g., maternal asthma, maternal body mass index, gestational weight gain, maternal smoking). Sensitivity analyses will be performed by excluding each study one by one and by calculating a pooled estimate for the remainder of the studies.

If any other subgroup/sensitivity analyses are identified during the process of the meta-analysis, these will be clearly labeled as post hoc analyses.

## **240 Risk of bias (quality) assessment**

241 The quality of cohort and case-control studies will be assessed using the  
242 Newcastle-Ottawa scale (NOS) <sup>30</sup>, which evaluates the selection (1 star for each term),  
243 comparability (up to 2 stars), and exposure or outcome (1 star for each term). A study  
244 with a high score indicates a low risk of bias. Additionally, the cross-sectional studies  
245 will be assessed using the Agency for Healthcare Research and Quality (AHRQ)  
246 recommended eleven items <sup>31</sup>. Furthermore, the Grading of Recommendations  
247 Assessment, Development and Evaluation (GRADE) methodology will be used to  
248 evaluate the overall likelihood of quality by examining 6 types of bias in each study  
249 (selection, exposure, outcome, analytic, attrition, and confounding) <sup>32</sup>. GRADE  
250 classifies the quality of studies as low, moderate, and high. The quality assessment of  
251 each study will be independently carried out by two of the authors, and any  
252 disagreements will be resolved through discussion (with a third author when  
253 necessary). We will use funnel plots to assess the publication bias, and Egger's linear  
254 regression will be applied to test for funnel plot asymmetry.

255

## **256 Strategy for data synthesis**

257 The overall pooled estimates for the association between HDP and asthma will be  
258 calculated in the meta-analysis. We will use the generic inverse variance method to  
259 determine both the crude and adjusted results. A summary OR estimate with a 95% CI

1  
2  
3  
4  
5  
6  
7  
8  
9  
10  
11  
12  
13  
14  
15  
16  
17  
18  
19  
20  
21  
22  
23  
24  
25  
26  
27  
28  
29  
30  
31  
32  
33  
34  
35  
36  
37  
38  
39  
40  
41  
42  
43  
44  
45  
46  
47  
48  
49  
50  
51  
52  
53  
54  
55  
56  
57  
58  
59  
60

will be calculated by using fixed-effect and random effects models. The *I*-squared statistics will be applied to examine heterogeneity. According to the Cochrane Handbook criteria, if the *I*-squared value is less than 50%, the heterogeneity is low, and a fixed-effect model will be used in the analysis. Otherwise, the heterogeneity will be considered high if the *I*-squared value is 50% or more, and a random effects model will be used. Forest plots will be constructed to show the study-specific RR/OR estimates and pooled RR/OR estimates. If a study is eligible for inclusion in the systematic review but does not provide adequate data for inclusion in the meta-analysis, a narrative synthesis will be conducted to summarize and tabulate the results. All analyses will be performed in STATA 14 and RevMan5.3.

**Presenting and reporting the results**

The study selection procedure will be outlined by a flow diagram according to the PRISMA statement in the meta-analysis. In addition, the reason for excluding studies will be presented. The characteristics of each included study, including the population, age range of participants, sample size, year range of studies, study design, country, exposure, outcome, measure of effect, unadjusted or adjusted effect (95% CI), and adjustment for covariates, will be tabulated in detail. The heterogeneity of the results will be listed in another table. Additionally, we will use the forest plots to present the pooled estimates in the meta-analysis. Eligible studies for which we could not obtain

raw data by contacting the corresponding authors will be listed individually in a separate table.

## Summary

In the systematic review and meta-analysis, we will assess the association between HDP and asthma in offspring by summarizing the existing literature based on a predesigned protocol. Our results might help to reveal the potential etiology of asthma involving fetal lung and immune system development during the prenatal period. Thus, the supporting evidence may promote strengthened surveillance of HDP-exposed infants, leading to early identification and intervention, finally improving lung function and asthma outcomes.

## Ethics and dissemination

There is no requirement for ethics approval because the meta-analysis and systematic review are based on published data. It is anticipated that the dissemination of results will take place at conferences and through publication in a peer-reviewed journal.

1  
2  
3  
4 298 **Acknowledgments**  
5  
6

7 299 We acknowledge suggestions from Imti Choonara (Emeritus Professor in Child  
8  
9  
10 300 Health and Editor in Chief BMJ Paeds Open, University of Nottingham, the Medical  
11  
12  
13 301 school, Derby, UK) on the conception and design of the analysis as well as other  
14  
15  
16 302 valuable advice to this manuscript.  
17

18  
19 303 **Author Contributions**  
20  
21

22  
23 304 The study was conceived by PL and TX. PL, TX, and YH developed the eligibility  
24  
25 305 criteria, search strategy, assessment of methodological quality, data extraction and  
26  
27  
28 306 data summary plan. PL and TX wrote the protocol. TX supervised the work. All  
29  
30  
31 307 authors approved the final version.  
32

33  
34 308 **Funding**  
35  
36

37  
38 309 This work is supported by the National Science Foundation of China (No. 81300525 to  
39  
40  
41 310 Tao Xiong , No. 81701540 to Ping Li), Deep Underground Space Medical Center (No.  
42  
43 311 DUGM201809 to Tao Xiong), and the Fundamental Research Funds for the Central  
44  
45  
46 312 Universities (to Tao Xiong).  
47

48  
49 313 **Competing Interests**  
50  
51

52 314 None declared.  
53  
54  
55

56 315  
57  
58

59 316 **References**  
60

1. Gillon TE, Pels A, Dadelszen PV, et al. Hypertensive disorders of pregnancy: A systematic review of international clinical practice guidelines. *Plos One* 2014;9(12):122-22.
2. Olson-Chen C, Seligman NS. Hypertensive Emergencies in Pregnancy. *Critical Care Clinics* 2016;32(1):29-41.
3. Obstetriciansgynecologists ACO. Hypertension in pregnancy. Report of the American College of Obstetricians and Gynecologists' Task Force on Hypertension in Pregnancy. *Obstetrics & Gynecology* 2013;122(5):1122-31.
4. Stokholm J, Sevelsted A, Anderson UD, et al. Preeclampsia Associates with Asthma, Allergy, and Eczema in Childhood. *Am J Respir Crit Care Med* 2017;195(5):614-21.
5. Pinheiro TV, Brunetto S, Ramos JG, et al. Hypertensive disorders during pregnancy and health outcomes in the offspring: a systematic review. *J Dev Orig Health Dis* 2016;7(4):391-407.
6. Boyd HA, Basit S, Behrens I, et al. Association Between Fetal Congenital Heart Defects and Maternal Risk of Hypertensive Disorders of Pregnancy in the Same Pregnancy and Across Pregnancies. *Circulation* 2017;136(1):39-48.
7. Zheng JS, Liu H, Ong KK, et al. Maternal Blood Pressure Rise During Pregnancy and Offspring Obesity Risk at 4 to 7 Years Old: The Jia xing Birth Cohort. *J Clin Endocrinol Metab* 2017;102(11):4315-22.
8. Tuovinen S, Eriksson JG, Kajantie E, et al. Maternal hypertensive pregnancy disorders and cognitive functioning of the offspring: a systematic review. *J Am Soc Hypertens* 2014;8(11):832-47.e1.
9. Maher GM, O'Keeffe GW, Kearney PM, et al. Association of Hypertensive Disorders of

- 339 Pregnancy With Risk of Neurodevelopmental Disorders in Offspring: A Systematic  
340 Review and Meta-analysis. *JAMA Psychiatry* 2018;75(8):809-19.
- 341 10. Gillman MW. Developmental origins of health and disease. *N Engl J Med*  
342 2005;353(17):1848-50.
- 343 11. Bousquet J, Anto JM, Berkouk K, et al. Developmental determinants in  
344 non-communicable chronic diseases and ageing. *Thorax* 2015;70(6):595-7.
- 345 12. Boulet LP, Reddel H, Bateman E, et al. The Global Initiative for Asthma (GINA): 25  
346 years later. *Eur Respir J* 2019; 54(2). doi:10.1183/13993003.00598-2019.
- 347 13. Huang K, Yang T, Xu J, et al. Prevalence, risk factors, and management of asthma in  
348 China: a national cross-sectional study. *Lancet* 2019; 394(10196): 407-18.
- 349 14. Cookson W. The alliance of genes and environment in asthma and allergy. *Nature*  
350 1999;402(6760 Suppl):B5-11.
- 351 15. Kleeberger SR, Peden D. Gene-environment interactions in asthma and other respiratory  
352 diseases. *Annu Rev Med* 2005;56:383-400.
- 353 16. Matthew M, Denise F, Shaun H, et al. The global burden of asthma: executive summary  
354 of the GINA Dissemination Committee report. *Allergy* 2004;59(5):469-78.
- 355 17. Bobolea I, Arismendi E, Valero A, et al. Early Life Origins of Asthma: A Review of  
356 Potential Effectors. *J Investig Allergol Clin Immunol* 2019;29(3):168-79.
- 357 18. Haland G, Carlsen KC, Sandvik L, et al. Reduced lung function at birth and the risk of  
358 asthma at 10 years of age. *N Engl J Med* 2006;355(16):1682-9.
- 359 19. Harding R, Maritz G. Maternal and fetal origins of lung disease in adulthood. *Semin Fetal*  
360 *Neonatal Med* 2012;17(2):67-72.

- 361 20. Postma DS, Bush A, van den Berge M. Risk factors and early origins of chronic  
362 obstructive pulmonary disease. *Lancet* 2015;385(9971):899-909.
- 363 21. Simpson CR, Sheikh A. Trends in the epidemiology of asthma in England: a national  
364 study of 333,294 patients. *J R Soc Med* 2010;103(3):98-106.
- 365 22. Liu X, Olsen J, Agerbo E, et al. Maternal preeclampsia and childhood asthma in the  
366 offspring. *Pediatr Allergy Immunol* 2015;26(2):181-5.
- 367 23. Byberg KK, Ogland B, Eide GE, et al. Birth after preeclamptic pregnancies: association  
368 with allergic sensitization and allergic rhinoconjunctivitis in late childhood; a historically  
369 matched cohort study. *BMC Pediatr* 2014;14:101-7.
- 370 24. Magee LA, Pels A, Helewa M, et al. Diagnosis, evaluation, and management of the  
371 hypertensive disorders of pregnancy: executive summary. *J Obstet Gynaecol Can*  
372 2014;36(5):416-41.
- 373 25. Lowe SA, Bowyer L, Lust K, et al. SOMANZ guidelines for the management of  
374 hypertensive disorders of pregnancy 2014. *Aust N Z J Obstet Gynaecol*  
375 2015;55(5):e1-29.
- 376 26. Brown MA, Magee LA, Kenny LC, et al. Hypertensive Disorders of Pregnancy: ISSHP  
377 Classification, Diagnosis, and Management Recommendations for International Practice.  
378 *Hypertension* 2018;72(1):24-43.
- 379 27. Papadopoulos NG, Arakawa H, Carlsen KH, et al. International consensus on (ICON)  
380 pediatric asthma. *Allergy* 2012;67(8):976-97.
- 381 28. Moher D, Shamseer L, Clarke M, et al. Preferred reporting items for systematic review  
382 and meta-analysis protocols (PRISMA-P) 2015 statement. *Systematic reviews* 2015;4:1.

1  
2  
3  
4  
5  
6  
7  
8  
9  
10  
11  
12  
13  
14  
15  
16  
17  
18  
19  
20  
21  
22  
23  
24  
25  
26  
27  
28  
29  
30  
31  
32  
33  
34  
35  
36  
37  
38  
39  
40  
41  
42  
43  
44  
45  
46  
47  
48  
49  
50  
51  
52  
53  
54  
55  
56  
57  
58  
59  
60

383       doi: 10.1186/2046-4053-4-1

384   29. Stroup DF, Berlin JA, Morton SC, et al. Meta-analysis of observational studies in

385       epidemiology: a proposal for reporting. Meta-analysis Of Ob servational Studies in

386       Epidemiology (MOOSE) group. *Jama* 2000;283(15):2008-12.

387   30. Andreas S. Critical evaluation of the Newcastle-Ottawa scale for the assessment of the

388       quality of nonrandomized studies in meta-analyses. *European Journal of Epidemiology*

389       2010;25(9):603-05.

390   31. Miller FP, Vandome AF, Mcbrewster J. Agency for healthcare research and quality2001.

391   32. Angela KH, Meerpohl JJ, Gerald G, et al. [GRADE guidelines: 14. Going from evidence

392       to recommendations: the significance and presentation of recommendations]. *Zeitschrift*

393       *Fur Evidenz Fortbildung Und Qualitat Im Gesundheitswesen* 2013;66(7):719-25.

394

**Table 1**

**Search strategy**  
**(for each electronic database to be searched)**

| #1 | Search terms                                                                            | No of records returned |
|----|-----------------------------------------------------------------------------------------|------------------------|
| 1  | hypertensive disorders during pregnancy                                                 |                        |
| 2  | hypertensive disorders in pregnancy                                                     |                        |
| 3  | hypertensive disorders of pregnancy                                                     |                        |
| 4  | pregnancy-induced hypertension                                                          |                        |
| 5  | eclampsia                                                                               |                        |
| 6  | pre-eclampsia                                                                           |                        |
| 7  | preeclampsia                                                                            |                        |
| 8  | preeclamptic pregnancy                                                                  |                        |
| 9  | chronic hypertension                                                                    |                        |
| 10 | gestational hypertension                                                                |                        |
| 11 | chronic hypertension with superimposed preeclampsia                                     |                        |
| 12 | postpartum hypertension                                                                 |                        |
| 13 | gravid hypertension                                                                     |                        |
| 14 | maternal hypertensive disorders                                                         |                        |
| 15 | (#1 OR #2 OR #3 OR #4 OR #5 OR #6 OR #7 OR #8 OR #9 OR #10 OR #11 OR #12 OR #13 OR #14) |                        |
| 16 | asthma                                                                                  |                        |
| 17 | wheeze                                                                                  |                        |
| 18 | wheezing                                                                                |                        |
| 19 | shortness of breath                                                                     |                        |
| 20 | bronchial spasm                                                                         |                        |
| 21 | bronchospasm                                                                            |                        |
| 22 | bronchoconstriction                                                                     |                        |
| 23 | bronchoconstrict                                                                        |                        |
| 24 | bronchial hyperreactivity                                                               |                        |

|    |                                                                                                            |  |
|----|------------------------------------------------------------------------------------------------------------|--|
| 25 | bronchial hyperresponsiveness                                                                              |  |
| 26 | reactive airway disease                                                                                    |  |
| 27 | obstructive lung disease                                                                                   |  |
| 28 | air low limitation                                                                                         |  |
| 29 | chronic obstructive respiratory disorder                                                                   |  |
| 30 | chronic obstructive pulmonary disease                                                                      |  |
| 31 | (#16 OR #17 OR #18 OR #19 OR #20 OR #21 OR #22 OR #23<br>OR #24 OR #25 OR #26 OR #27 OR #28 OR #29 OR #30) |  |
| 32 | (#15 AND #31)                                                                                              |  |
| 33 | limit #32 to English language                                                                              |  |
| 34 | limit #33 to humans                                                                                        |  |

**Table 2. Data Extraction Form for Review and meta-analysis**

| Study Details                               |                                      |
|---------------------------------------------|--------------------------------------|
| <b>General information</b>                  |                                      |
| • First author                              |                                      |
| • Year of publication                       |                                      |
| • Study location                            |                                      |
| • Study duration                            |                                      |
| <b>Study eligibility</b>                    |                                      |
| • Study design (case-control, cohort)       |                                      |
| • Participants                              |                                      |
| exposed group                               |                                      |
| unexposed group                             |                                      |
| • Inclusion criteria                        |                                      |
| • Exclusion criteria                        |                                      |
| • Ascertainment of exposure                 |                                      |
| • Outcome diagnostic criteria               |                                      |
| • Confounding variables                     |                                      |
| • Matching factors                          |                                      |
| Include or exclude                          | Include                      exclude |
| Reason for exclusion                        |                                      |
| <b>Characteristics of included studies</b>  |                                      |
| • Sample size                               |                                      |
| exposed group (including subgroups)         |                                      |
| unexposed group                             |                                      |
| • Data source                               |                                      |
| • Race                                      |                                      |
| • Income level of country                   |                                      |
| • Maternal adjusted factors                 |                                      |
| Maternal age, yrs                           |                                      |
| Educational level                           |                                      |
| Maternal asthma                             |                                      |
| Maternal body mass index, kg/m <sup>2</sup> |                                      |
| Gestational weight gain, kg                 |                                      |

1  
2  
3  
4  
5  
6  
7  
8  
9  
10  
11  
12  
13  
14  
15  
16  
17  
18  
19  
20  
21  
22  
23  
24  
25  
26  
27  
28  
29  
30  
31  
32  
33  
34  
35  
36  
37  
38  
39  
40  
41  
42  
43  
44  
45  
46  
47  
48  
49  
50  
51  
52  
53  
54  
55  
56  
57  
58  
59  
60

|                                         |  |
|-----------------------------------------|--|
| Parity                                  |  |
| Maternal smoking                        |  |
| Others                                  |  |
| • Children`s adjusted factors           |  |
| Gender (M/F)                            |  |
| Birth weight, kg                        |  |
| Gestational age, w                      |  |
| Offspring age at diagnosis, yrs         |  |
| Others                                  |  |
| <b>Main outcome</b>                     |  |
| Effect estimates (RR or OR) with 95% CI |  |
| Mean difference                         |  |
| Other findings                          |  |

**Risk of Bias assessment (For cohort studies)**

| Domain         | Item                                                                       | Score                                                                                                                                                                                                                                                                                                                               |
|----------------|----------------------------------------------------------------------------|-------------------------------------------------------------------------------------------------------------------------------------------------------------------------------------------------------------------------------------------------------------------------------------------------------------------------------------|
| Selection      | 1) Representativeness of the exposed cohort                                | a) truly representative of the average ____ (describe) in the community *<br>b) somewhat representative of the average ____ in the community c) selected group of users eg nurses, volunteers *<br>d) no description of the derivation of the cohort                                                                                |
|                | 2) Representativeness of the non-exposed cohort                            | a) drawn from the same community as the exposed cohort *<br>b) drawn from a different source<br>c) no description of the derivation of the non exposed cohort                                                                                                                                                                       |
|                | 3) Ascertainment of exposure                                               | a) secure record (eg surgical records) *<br>b) structured interview *<br>c) written self report<br>d) no description                                                                                                                                                                                                                |
|                | 4) Demonstration the outcome of interest was not present at start of study | a) yes *<br>b) no                                                                                                                                                                                                                                                                                                                   |
| Comparability  | 1) Comparability of cohort on the basis of the design or analysis          | a) study controls for ____ (select the most important factor) *<br>b) study controls for any additional factor * (This criteria could be modified to indicate specific control for a second important factor.)                                                                                                                      |
| Outcome        | 1) Assessment of outcome                                                   | a) independent blind assessment *<br>b) record linkage *<br>c) self report<br>d) no description                                                                                                                                                                                                                                     |
|                | 2) Was follow-up long enough for outcomes to occur                         | a) yes (select an adequate follow up period for outcome of interest) *<br>b) no                                                                                                                                                                                                                                                     |
|                | 3) Adequacy of follow up of cohort                                         | a) complete follow up - all subjects accounted for *<br>b) subjects lost to follow up unlikely to introduce bias - small number lost - > ____ % (select an adequate %) follow up, or description provided of those lost) *<br>c) follow up rate < ____ % (select an adequate %) and no description of those lost<br>d) no statement |
| Quality scores |                                                                            |                                                                                                                                                                                                                                                                                                                                     |

1  
2  
3  
4  
5  
6  
7  
8  
9  
10  
11  
12  
13  
14  
15  
16  
17  
18  
19  
20  
21  
22  
23  
24  
25  
26  
27  
28  
29  
30  
31  
32  
33  
34  
35  
36  
37  
38  
39  
40  
41  
42  
43  
44  
45  
46  
47  
48  
49  
50  
51  
52  
53  
54  
55  
56  
57  
58  
59  
60

**Risk of Bias assessment (For case control studies)**

| Domain         | Item                                                                          | Score                                                                                                                                                                                                                              |
|----------------|-------------------------------------------------------------------------------|------------------------------------------------------------------------------------------------------------------------------------------------------------------------------------------------------------------------------------|
| Selection      | 1) Is the case definition adequate                                            | a) yes, with independent validation★<br>b) yes, eg record linkage or based on self reports<br>c) no description                                                                                                                    |
|                | 2) Representativeness of the cases                                            | a) consecutive or obviously representative series of cases★<br>b) potential for selection biases or not stated                                                                                                                     |
|                | 3) Selection of Controls                                                      | a) community controls ★<br>b) hospital controls<br>c) no description                                                                                                                                                               |
|                | 4) Definition of Controls                                                     | a) no history of disease (endpoint) ★<br>b) no description of source                                                                                                                                                               |
| Comparability  | 1) Comparability of cases and controls on the basis of the design or analysis | a) study controls for ____ (Select the most important factor.)★<br>b) study controls for any additional factor ★ (This criteria could be modified to indicate specific control for a second important factor.)                     |
| Exposure       | 1) Ascertainment of exposure                                                  | a) secure record ( eg surgical records) ★<br>b) structured interview where blind to case/control status ★<br>c) interview not blinded to case/control status<br>d) written self report or medical record only<br>e) no description |
|                | 2) Same method of ascertainment for cases and controls                        | a) yes ★<br>b) no                                                                                                                                                                                                                  |
|                | 3) Non-Response rate                                                          | a) same rate for both groups ★<br>b) non respondents described<br>c) rate different and no designation                                                                                                                             |
| Quality scores |                                                                               |                                                                                                                                                                                                                                    |

**Other information**

|                                                       | Description as stated in report/paper |
|-------------------------------------------------------|---------------------------------------|
| Key conclusions                                       |                                       |
| Study funding sources                                 |                                       |
| Conflicts of interest                                 |                                       |
| References to other relevant studies                  |                                       |
| Correspondence required for further study information |                                       |

# Reporting checklist for protocol of a systematic review.

Based on the PRISMA-P guidelines.

## Instructions to authors

Complete this checklist by entering the page numbers from your manuscript where readers will find each of the items listed below.

Your article may not currently address all the items on the checklist. Please modify your text to include the missing information. If you are certain that an item does not apply, please write "n/a" and provide a short explanation.

Upload your completed checklist as an extra file when you submit to a journal.

In your methods section, say that you used the PRISMA-Preorting guidelines, and cite them as:

Moher D, Shamseer L, Clarke M, Ghersi D, Liberati A, Petticrew M, Shekelle P, Stewart LA. Preferred Reporting Items for Systematic Review and Meta-Analysis Protocols (PRISMA-P) 2015 statement. Syst Rev. 2015;4(1):1.

| Reporting Item |                                                                                                                                               | Page Number         |
|----------------|-----------------------------------------------------------------------------------------------------------------------------------------------|---------------------|
| Title          |                                                                                                                                               |                     |
| Identification | #1a Identify the report as a protocol of a systematic review                                                                                  | 1                   |
| Update         | #1b If the protocol is for an update of a previous systematic review, identify as such                                                        | 2                   |
| Registration   |                                                                                                                                               |                     |
|                | #2 If registered, provide the name of the registry (such as PROSPERO) and registration number                                                 | n/a<br>under review |
| Authors        |                                                                                                                                               |                     |
| Contact        | #3a Provide name, institutional affiliation, e-mail address of all protocol authors; provide physical mailing address of corresponding author | 1                   |
| Contribution   | #3b Describe contributions of protocol authors and identify the guarantor of the review                                                       | 16                  |

## Amendments

|                    |                                                                                                                                                                                                 |   |
|--------------------|-------------------------------------------------------------------------------------------------------------------------------------------------------------------------------------------------|---|
| <a href="#">#4</a> | If the protocol represents an amendment of a previously completed or published protocol, identify as such and list changes; otherwise, state plan for documenting important protocol amendments | 2 |
|--------------------|-------------------------------------------------------------------------------------------------------------------------------------------------------------------------------------------------|---|

## Support

|                           |                     |                                                                                                      |   |
|---------------------------|---------------------|------------------------------------------------------------------------------------------------------|---|
| Sources                   | <a href="#">#5a</a> | Indicate sources of financial or other support for the review                                        | 1 |
| Sponsor                   | <a href="#">#5b</a> | Provide name for the review funder and / or sponsor                                                  | 1 |
| Role of sponsor or funder | <a href="#">#5c</a> | Describe roles of funder(s), sponsor(s), and / or institution(s), if any, in developing the protocol | 1 |

## Introduction

|            |                    |                                                                                                                                                          |     |
|------------|--------------------|----------------------------------------------------------------------------------------------------------------------------------------------------------|-----|
| Rationale  | <a href="#">#6</a> | Describe the rationale for the review in the context of what is already known                                                                            | 5-6 |
| Objectives | <a href="#">#7</a> | Provide an explicit statement of the question(s) the review will address with reference to participants, interventions, comparators, and outcomes (PICO) | 7   |

## Methods

|                                   |                      |                                                                                                                                                                                                                               |       |
|-----------------------------------|----------------------|-------------------------------------------------------------------------------------------------------------------------------------------------------------------------------------------------------------------------------|-------|
| Eligibility criteria              | <a href="#">#8</a>   | Specify the study characteristics (such as PICO, study design, setting, time frame) and report characteristics (such as years considered, language, publication status) to be used as criteria for eligibility for the review | 11-12 |
| Information sources               | <a href="#">#9</a>   | Describe all intended information sources (such as electronic databases, contact with study authors, trial registers or other grey literature sources) with planned dates of coverage                                         | 10-11 |
| Search strategy                   | <a href="#">#10</a>  | Present draft of search strategy to be used for at least one electronic database, including planned limits, such that it could be repeated                                                                                    | 10-11 |
| Study records - data management   | <a href="#">#11a</a> | Describe the mechanism(s) that will be used to manage records and data throughout the review                                                                                                                                  | 11    |
| Study records - selection process | <a href="#">#11b</a> | State the process that will be used for selecting studies (such as two independent reviewers) through each phase of the review                                                                                                | 11-12 |

(that is, screening, eligibility and inclusion in meta-analysis)

|                                         |                      |                                                                                                                                                                                                                                                           |       |
|-----------------------------------------|----------------------|-----------------------------------------------------------------------------------------------------------------------------------------------------------------------------------------------------------------------------------------------------------|-------|
| Study records - data collection process | <a href="#">#11c</a> | Describe planned method of extracting data from reports (such as piloting forms, done independently, in duplicate), any processes for obtaining and confirming data from investigators                                                                    | 11-12 |
| Data items                              | <a href="#">#12</a>  | List and define all variables for which data will be sought (such as PICO items, funding sources), any pre-planned data assumptions and simplifications                                                                                                   | 11-12 |
| Outcomes and prioritization             | <a href="#">#13</a>  | List and define all outcomes for which data will be sought, including prioritization of main and additional outcomes, with rationale                                                                                                                      | 8-9   |
| Risk of bias in individual studies      | <a href="#">#14</a>  | Describe anticipated methods for assessing risk of bias of individual studies, including whether this will be done at the outcome or study level, or both; state how this information will be used in data synthesis                                      | 12-13 |
| Data synthesis                          | <a href="#">#15a</a> | Describe criteria under which study data will be quantitatively synthesised                                                                                                                                                                               | 13-14 |
| Data synthesis                          | <a href="#">#15b</a> | If data are appropriate for quantitative synthesis, describe planned summary measures, methods of handling data and methods of combining data from studies, including any planned exploration of consistency (such as I <sup>2</sup> , Kendall's $\tau$ ) | 13-14 |
| Data synthesis                          | <a href="#">#15c</a> | Describe any proposed additional analyses (such as sensitivity or subgroup analyses, meta-regression)                                                                                                                                                     | 12    |
| Data synthesis                          | <a href="#">#15d</a> | If quantitative synthesis is not appropriate, describe the type of summary planned                                                                                                                                                                        | 14    |
| Meta-bias(es)                           | <a href="#">#16</a>  | Specify any planned assessment of meta-bias(es) (such as publication bias across studies, selective reporting within studies)                                                                                                                             | 13    |
| Confidence in cumulative evidence       | <a href="#">#17</a>  | Describe how the strength of the body of evidence will be assessed (such as GRADE)                                                                                                                                                                        | 14    |

None The PRISMA-P checklist is distributed under the terms of the Creative Commons Attribution License CC-BY 4.0. This checklist can be completed online using <https://www.goodreports.org/>, a tool made by the EQUATOR Network in collaboration with [Penelope.ai](#)

# BMJ Open

## Hypertensive Disorders of Pregnancy and Risk of Asthma in Offspring: Protocol for A Systematic Review and Meta-Analysis

|                                 |                                                                                                                                                                                                                                                                                                                                                                                                                                                                                                                                                                                                                                                                        |
|---------------------------------|------------------------------------------------------------------------------------------------------------------------------------------------------------------------------------------------------------------------------------------------------------------------------------------------------------------------------------------------------------------------------------------------------------------------------------------------------------------------------------------------------------------------------------------------------------------------------------------------------------------------------------------------------------------------|
| Journal:                        | <i>BMJ Open</i>                                                                                                                                                                                                                                                                                                                                                                                                                                                                                                                                                                                                                                                        |
| Manuscript ID                   | bmjopen-2019-035145.R1                                                                                                                                                                                                                                                                                                                                                                                                                                                                                                                                                                                                                                                 |
| Article Type:                   | Protocol                                                                                                                                                                                                                                                                                                                                                                                                                                                                                                                                                                                                                                                               |
| Date Submitted by the Author:   | 25-Feb-2020                                                                                                                                                                                                                                                                                                                                                                                                                                                                                                                                                                                                                                                            |
| Complete List of Authors:       | Li, Ping; West China Second University Hospital, Sichuan University, Department of Pediatrics; Key Laboratory of Birth Defects and Related Diseases of Women and Children (Sichuan University) Ministry of Education<br>Xiong, tao; West China Second University Hospital, Sichuan University, Department of Pediatrics; Key Laboratory of Birth Defects and Related Diseases of Women and Children (Sichuan University) Ministry of Education<br>Hu, Yong; West China Second University Hospital, Sichuan University, Department of Pediatrics; Key Laboratory of Birth Defects and Related Diseases of Women and Children (Sichuan University) Ministry of Education |
| <b>Primary Subject Heading</b>: | Paediatrics                                                                                                                                                                                                                                                                                                                                                                                                                                                                                                                                                                                                                                                            |
| Secondary Subject Heading:      | Research methods, Obstetrics and gynaecology, Paediatrics                                                                                                                                                                                                                                                                                                                                                                                                                                                                                                                                                                                                              |
| Keywords:                       | Asthma < THORACIC MEDICINE, Hypertension < CARDIOLOGY, PERINATOLOGY, PAEDIATRICS, Community child health < PAEDIATRICS                                                                                                                                                                                                                                                                                                                                                                                                                                                                                                                                                 |
|                                 |                                                                                                                                                                                                                                                                                                                                                                                                                                                                                                                                                                                                                                                                        |

SCHOLARONE™  
Manuscripts



I, the Submitting Author has the right to grant and does grant on behalf of all authors of the Work (as defined in the below author licence), an exclusive licence and/or a non-exclusive licence for contributions from authors who are: i) UK Crown employees; ii) where BMJ has agreed a CC-BY licence shall apply, and/or iii) in accordance with the terms applicable for US Federal Government officers or employees acting as part of their official duties; on a worldwide, perpetual, irrevocable, royalty-free basis to BMJ Publishing Group Ltd ("BMJ") its licensees and where the relevant Journal is co-owned by BMJ to the co-owners of the Journal, to publish the Work in this journal and any other BMJ products and to exploit all rights, as set out in our [licence](#).

The Submitting Author accepts and understands that any supply made under these terms is made by BMJ to the Submitting Author unless you are acting as an employee on behalf of your employer or a postgraduate student of an affiliated institution which is paying any applicable article publishing charge ("APC") for Open Access articles. Where the Submitting Author wishes to make the Work available on an Open Access basis (and intends to pay the relevant APC), the terms of reuse of such Open Access shall be governed by a Creative Commons licence – details of these licences and which [Creative Commons](#) licence will apply to this Work are set out in our licence referred to above.

Other than as permitted in any relevant BMJ Author's Self Archiving Policies, I confirm this Work has not been accepted for publication elsewhere, is not being considered for publication elsewhere and does not duplicate material already published. I confirm all authors consent to publication of this Work and authorise the granting of this licence.

**Hypertensive Disorders of Pregnancy and Risk of Asthma in Offspring: Protocol  
for A Systematic Review and Meta-Analysis**

Ping Li, MD,<sup>1,2</sup> Tao Xiong\*, MD PhD <sup>1,2,3</sup> Yong Hu, MD <sup>1,2</sup>

<sup>1</sup> Department of Pediatrics, West China Second University Hospital, Sichuan University,  
Chengdu, China

<sup>2</sup> Key Laboratory of Birth Defects and Related Diseases of Women and Children (Sichuan  
University), Ministry of Education

<sup>3</sup> Deep Underground Space Medical Center, West China Hospital, Sichuan University, Chengdu,  
China

Ping Li: [liping\\_371986@163.com](mailto:liping_371986@163.com)

Yong Hu: [huyong1003@163.com](mailto:huyong1003@163.com)

**Funding**

This work was supported by the National Science Foundation of China (No. 81300525 to Tao Xiong,  
No. 81701540 to Ping Li), the Deep Underground Space Medical Center (No. DUGM201809 to Tao  
Xiong), and Fundamental Research Funds for the Central Universities (to Tao Xiong).

**\*Correspondence**

Dr. Tao Xiong

1  
2  
3  
4  
5  
6  
7  
8  
9  
10  
11  
12  
13  
14  
15  
16  
17  
18  
19  
20  
21  
22  
23  
24  
25  
26  
27  
28  
29  
30  
31  
32  
33  
34  
35  
36  
37  
38  
39  
40  
41  
42  
43  
44  
45  
46  
47  
48  
49  
50  
51  
52  
53  
54  
55  
56  
57  
58  
59  
60

- 19 No. 20, Section Three, South Renmin Road, Chengdu, China
- 20 Tel: 86 13730652940
- 21 Email: tao\_xiong@126.com
- 22 Word count: 2260

For peer review only

## 23 Abstract

24 **Introduction:** Hypertensive disorders of pregnancy (HDP), one of the most common  
25 obstetrical complications, has been reported to have a controversial relationship with  
26 the increased risk of asthma in offspring. No systematic review of this topic has been  
27 performed. The aim of this systematic review will be to summarize the available  
28 evidence examining the association between HDP and the risk of asthma in offspring.

29 **Methods and analysis:** We will follow the Preferred Reporting Items for Systematic  
30 Reviews and Meta-Analyses (PRISMA) and Meta-analysis of Observational Studies in  
31 Epidemiology (MOOSE) guidelines. A systematic search of the PubMed, EMBASE,  
32 Cochrane and Web of Science databases will be performed using a detailed search  
33 strategy from database inception through Dec. 31, 2019. Cohort, case-control and cross-  
34 sectional studies that report a diagnosis of maternal HDP and asthma in offspring will  
35 be included. Studies will be limited to the English language and include only human  
36 participants. Two independent reviewers will conduct the study selection, data  
37 extraction, and risk of bias assessments using a standardized data extraction form. A  
38 meta-analysis will be performed to calculate overall pooled estimates using the generic  
39 inverse variance method. The data will be synthesized by either fixed-effect or random  
40 effects models according to heterogeneity tests. All analyses will be performed in  
41 STATA 14 and RevMan 5.3. High-quality evidence of the relationship between HDP  
42 and the risk of asthma in exposed offspring will be identified through the synthesis of  
43 current studies. In addition, the results of subgroup analyses and related secondary

1  
2  
3  
4  
5  
6  
7  
8  
9  
10  
11  
12  
13  
14  
15  
16  
17  
18  
19  
20  
21  
22  
23  
24  
25  
26  
27  
28  
29  
30  
31  
32  
33  
34  
35  
36  
37  
38  
39  
40  
41  
42  
43  
44  
45  
46  
47  
48  
49  
50  
51  
52  
53  
54  
55  
56  
57  
58  
59  
60

outcomes will be reported. The following will be concluded: (i) whether HDP increases the risk of asthma in offspring; (ii) whether HDP affects the severity of asthma in exposed offspring; and (iii) whether possible differences in the risk of asthma among different HDP subgroups exist.

**Keywords:** Asthma, Hypertension, Perinatology, Pediatrics, Community child health

**Ethics and dissemination**

There is no requirement for ethics approval because the meta-analysis and systematic review will be based on published data. It is anticipated that the dissemination of results will take place at conferences and through publication in a peer-reviewed journal.

**Strengths and limitations of this study**

- This will be the first meta-analysis to explore the relationship between HDP and the risk of asthma in exposed offspring.
- This protocol was designed following the Preferred Reporting Items for Systematic Reviews and Meta-Analyses (PRISMA) and Meta-analysis of Observational Studies in Epidemiology (MOOSE) guidelines.

- 1  
2  
3  
4 62 ➤ Since there may be some potential confounding factors, we will perform detailed  
5  
6 63 subgroup analyses to reduce the effects of confounding factors.  
7  
8  
9  
10 64 ➤ Since positive results are more prone to be published online, funnel plots will be  
11  
12 65 used to assess publication bias.  
13  
14  
15  
16 66 ➤ Selection bias will be considered because the pooled data will be obtained from  
17  
18 67 observational studies.  
19  
20  
21  
22  
23  
24  
25  
26  
27  
28  
29  
30  
31  
32  
33  
34  
35  
36  
37  
38  
39  
40  
41  
42  
43  
44  
45  
46  
47  
48  
49  
50  
51  
52  
53  
54  
55  
56  
57  
58  
59  
60

1  
2  
3  
4  
5  
6  
7  
8  
9  
10  
11  
12  
13  
14  
15  
16  
17  
18  
19  
20  
21  
22  
23  
24  
25  
26  
27  
28  
29  
30  
31  
32  
33  
34  
35  
36  
37  
38  
39  
40  
41  
42  
43  
44  
45  
46  
47  
48  
49  
50  
51  
52  
53  
54  
55  
56  
57  
58  
59  
60

68     **INTRODUCTION**

69     Hypertensive disorders of pregnancy (HDP) is estimated to affect 5% to 15% of all  
70     pregnancies and is recognized as one of the most common obstetrical complications <sup>1</sup>  
71     <sup>2</sup>. HDP includes any hypertensive condition before gestation or manifested before 20  
72     weeks and hypertension starting at or after 20 weeks; types of hypertension include  
73     gestational hypertension (GH), preeclampsia (PE), chronic hypertension, and PE  
74     superimposed on chronic hypertension according to the International Society for the  
75     Study of Hypertension in Pregnancy <sup>3</sup>. Recent studies have reported that HDP is closely  
76     associated with an increased risk of diseases in offspring, including asthma, allergy,  
77     eczema <sup>4</sup>, high blood pressure <sup>5</sup>, congenital heart defects <sup>6</sup>, obesity <sup>7</sup>, autism spectrum  
78     disorder (ASD), attention-deficit/hyperactivity disorder (ADHD), low cognitive  
79     function, anxiety/depression, and other neurodevelopmental disorders <sup>8 9</sup>. The  
80     “Developmental Origins of Health and Disease (DOHaD)” hypothesis, which has been  
81     widely confirmed, suggests that fetuses exposed to adverse uterine environments are  
82     prone to develop chronic noncommunicable diseases later in life owing to perpetual  
83     alterations in the fetal vasculature, cardiac structure, pancreas, adipose tissue and brain  
84     structure <sup>10 11</sup>. In addition, HDP induces a detrimental in utero environment, with  
85     systemic inflammation and oxidative stress experienced by the fetus, thus impairing  
86     vulnerable fetal lung development and disturbing immune function, which may persist  
87     throughout life in the offspring.

1  
2  
3  
4 88 Asthma, a common lung disease associated with abnormal inflammation and  
5  
6  
7 89 immune response, is characterized by variable symptoms of wheezing, shortness of  
8  
9  
10 90 breath, chest tightness and/or cough, and variable expiratory airflow limitation. It is a  
11  
12 91 chronic disease of childhood and is responsible for the majority school absences,  
13  
14 92 emergency department visits and hospitalizations. Thus, asthma has been regarded as a  
15  
16  
17 93 major public health challenge worldwide, affecting 1-18% of populations in different  
18  
19 94 countries <sup>12 13</sup>. The development of asthma has generally been attributed to the  
20  
21  
22 95 interactions between genetics and environmental factors <sup>14 15</sup>. Currently, it is widely  
23  
24  
25 96 accepted that asthma develops early in life <sup>16</sup>. Recurrent wheezing and other asthma-  
26  
27  
28 97 like symptoms usually begin within the first few weeks or months after birth. There is  
29  
30  
31 98 increasing evidence to suggest that negative events occurring early in life, even in the  
32  
33  
34 99 perinatal period, significantly increase the risk of asthma and poor lung function later  
35  
36 100 in life <sup>17 18</sup>. Hence, adverse obstetrical events, such as HDP, may have strong effects on  
37  
38  
39 101 fetal airway structure and lung and immune system development during the prenatal  
40  
41 102 period and may significantly increase the susceptibility of offspring to asthma <sup>19 20</sup>.

42  
43  
44 103 Approximately half of individuals with asthma are reported to have suffered from  
45  
46  
47 104 asthma-like symptoms during childhood <sup>21</sup>. Therefore, early recognition and  
48  
49  
50 105 intervention are critical to reduce short- and long-term morbidity and to prevent  
51  
52  
53 106 potential long-term sequelae resulting in impaired lung function. Recent studies have  
54  
55 107 shown that HDP is a potential risk factor for childhood asthma in offspring <sup>4 22</sup>.  
56  
57  
58 108 However, the association between HDP and asthma is controversial <sup>23</sup>. Identifying the  
59  
60

1  
2  
3  
4  
5  
6  
7  
8  
9  
10  
11  
12  
13  
14  
15  
16  
17  
18  
19  
20  
21  
22  
23  
24  
25  
26  
27  
28  
29  
30  
31  
32  
33  
34  
35  
36  
37  
38  
39  
40  
41  
42  
43  
44  
45  
46  
47  
48  
49  
50  
51  
52  
53  
54  
55  
56  
57  
58  
59  
60

relationship between HDP and asthma could help us to understand the pathogenesis of asthma. It also facilitates early asthma recognition and intervention in high-risk populations. Therefore, we aim to perform a systematic review and meta-analysis to summarize the available evidence regarding the relationship between HDP and asthma in offspring.

**OBJECTIVES**

The aim of the present systematic review and meta-analysis is to summarize the available evidence to explore the following:

- 1. Whether HDP increases the risk of asthma in offspring;
- 2. Whether HDP affects the severity of asthma in exposed offspring; and
- 3. Whether differences in the risk of asthma among different HDP subgroups exist.

The study will be conducted based on the following requirements.

**Population**

Pregnant women and their offspring at any age (both child offspring and adult offspring) will be included.

**Intervention/exposures**

126 HDP, defined as any hypertension (systolic blood pressure (BP)  $\geq 140$  and/or diastolic  
127 BP  $\geq 90$  mmHg) during pregnancy, mainly includes the following:

128 (1) GH: any hypertensive disorder that develops at or after 20 weeks of gestation in  
129 the absence of features of preeclampsia (PE);

130 (2) PE: GH accompanied by one or more of the following new-onset conditions at or  
131 after 20 weeks of gestation: (i) proteinuria, (ii) maternal organ dysfunction, such as  
132 acute kidney injury, liver complications, neurological complications, or hematological  
133 complications, and (iii) uteroplacental dysfunction;

134 (3) Chronic hypertension (essential and secondary): high blood pressure predating  
135 pregnancy or recognized at  $< 20$  weeks of gestation; and

136 (4) PE superimposed on chronic hypertension: chronic essential hypertension  
137 accompanied by any of the above maternal organ dysfunctions consistent with PE.

138 The definitions were developed according to current guidelines, such as the Canadian  
139 Hypertensive Disorders of Pregnancy Working Group<sup>24</sup>, Society of Obstetric Medicine  
140 of Australia and New Zealand<sup>25</sup>, American College of Obstetricians and Gynecologists  
141<sup>3</sup>, and International Society for the Study of Hypertension in Pregnancy guidelines<sup>26</sup>.

## 142 **Comparison**

143 Normotensive pregnant women will be used as the control group.

## 144 **Outcomes**

1  
2  
3  
4  
5  
6  
7  
8  
9  
10  
11  
12  
13  
14  
15  
16  
17  
18  
19  
20  
21  
22  
23  
24  
25  
26  
27  
28  
29  
30  
31  
32  
33  
34  
35  
36  
37  
38  
39  
40  
41  
42  
43  
44  
45  
46  
47  
48  
49  
50  
51  
52  
53  
54  
55  
56  
57  
58  
59  
60

1. Primary outcome: asthma.
- Asthma is defined by a history of respiratory symptoms, including wheezing, shortness of breath, chest tightness and cough, that vary over time and in intensity in addition to variable expiratory airflow limitation according to the Global Initiative for Asthma (GINA) <sup>12</sup> and International Collaboration in Asthma, Allergy and Immunology (iCAALL)<sup>27</sup>.
2. Secondary outcomes:
- (1) Wheezing/recurrent wheezing;
- (2) Lung/pulmonary function (including forced expiratory volume in one second [FEV<sub>1</sub>], forced expiratory volume at 0.5 seconds [FEV<sub>0.5</sub>], forced vital capacity [FVC], FEV<sub>1</sub>/FVC, 50% of the forced expiratory flow [FEF<sub>50</sub>] and 75% of the forced expiratory flow [FEF<sub>75</sub>], maximal midexpiratory flow [FEF<sub>25-75</sub>]), active asthma, asthma exacerbations and asthma treatment (including hospitalization, systemic corticosteroid use, inhaled  $\beta_2$ -agonist use, inhaled corticosteroid [ICS] use, combination of inhaled  $\beta_2$ -agonists and corticosteroid use, leukotriene antagonist use, and other antiasthma medication use); and
3. Serum IgE levels.

**METHODS**

164 The systematic review and meta-analysis will follow the Preferred Reporting Items for  
165 Systematic Reviews and Meta-Analysis (PRISMA) <sup>28</sup> and Meta-analysis of  
166 Observational Studies in Epidemiology (MOOSE) guidelines <sup>29</sup>.

## 168 **Criteria for considering studies for review**

### 169 **Inclusion criteria**

170 (1) Studies with cohort, case-control and cross-sectional designs that report a  
171 diagnosis of HDP and asthma in offspring as the outcome of interest;

172 (2) Studies that estimate the relationship between HDP and asthma and report the  
173 estimated risks (odds ratios [ORs] or relative risks [RRs]) with 95% confidence  
174 intervals (CIs) or provide sufficient information to calculate these values;

175 (3) Studies published in only the English language;

176 (4) Studies published in any year; and

177 (5) Studies that include only humans.

### 178 **Exclusion criteria**

179 (1) Conference abstracts, letters to the editor, reviews and commentary articles;

180 (2) Studies with overlapping data; or

1  
2  
3  
4  
5  
6  
7  
8  
9  
10  
11  
12  
13  
14  
15  
16  
17  
18  
19  
20  
21  
22  
23  
24  
25  
26  
27  
28  
29  
30  
31  
32  
33  
34  
35  
36  
37  
38  
39  
40  
41  
42  
43  
44  
45  
46  
47  
48  
49  
50  
51  
52  
53  
54  
55  
56  
57  
58  
59  
60

181 (3) Studies missing raw data.

182

183 **Search strategy**

184 A systematic search of the literature will be conducted in the PubMed, EMBASE,  
185 Cochrane and Web of Science databases from database inception through Dec. 31, 2019.  
186 We will search databases such as Google Scholar for gray literature. A three-phase  
187 search strategy will be applied in this review.

188 1. For HDP, the following combination of search terms will be used: “hypertensive  
189 disorders during pregnancy” or “hypertensive disorders in pregnancy” or “hypertensive  
190 disorders of pregnancy” or “pregnancy-induced hypertension” or “eclampsia” or  
191 “preeclampsia” or “preeclampsia” or “preeclamptic pregnancy” or “chronic  
192 hypertension” or ”gestational hypertension” or “chronic hypertension with  
193 superimposed preeclampsia” or “postpartum hypertension” or “maternal hypertensive  
194 disorders”.

195 2. For asthma, the following search terms will be used: “asthma” or “wheeze” or  
196 “wheezing” or “shortness of breath” or “bronchial spasm” or “bronchospasm” or  
197 “bronchoconstriction” or “bronchoconstrict” or “bronchial hyperreactivity” or  
198 “bronchial hyperresponsiveness” or “reactive airway disease” or “obstructive lung

199 disease” or “air low limitation” or “chronic obstructive respiratory disorder” or “chronic  
200 obstructive pulmonary disease”.

201 3. We will combine steps 1 and 2 with “and”.

202 The detailed search strategy is listed in Supplement table 1. We will manually search  
203 the reference lists of the included studies to further identify eligible studies.

204

### 205 **Study selection and data extraction**

206 The eligibility of each study will be assessed independently by two investigators (PL  
207 and TX), and disagreements will be solved by discussion (with a third author, YH, when  
208 necessary). Data from the identified studies will be extracted using the standardized  
209 data extraction form listed in Supplement table 2. The titles and abstracts of the studies  
210 retrieved from each database will be stored and managed in the EndNote reference  
211 manager. For each included study, we will extract the following information: first  
212 author’s last name, year of publication, study location, study design, sample size,  
213 ascertainment of exposure (HDP and its subgroups), outcome diagnostic criteria,  
214 offspring age at diagnosis, adjusted/matched confounding variables and effects  
215 estimates (RRs or ORs) with 95% CIs. The eligibility of each study will be assessed  
216 independently by two investigators (PL and TX), and disagreements will be solved by  
217 discussion (with a third author, YH, when necessary).

1  
2  
3  
4 218  
5  
6  
7  
8 219 **Subgroups/subsets**  
9

10  
11 220 Subgroup analyses will be carried out according to the following: (1) study design  
12  
13 221 (cohort vs. case-control vs. cross-sectional), (2) sample size, (3) location (e.g., Europe  
14  
15 222 vs. United States), (4) income level of the country (low/middle/high), (5) year of  
16  
17 223 publication, (6) study subject selection, (7) study quality (minimal/low vs.  
18  
19 224 moderate/high), (8) adjusted offspring factors (e.g., age at diagnosis of asthma, sex,  
20  
21 225 birth weight, gestational age), and (9) adjusted maternal factors (e.g., maternal asthma,  
22  
23 226 maternal body mass index, gestational weight gain, maternal smoking). Sensitivity  
24  
25 227 analyses will be performed by excluding each study one by one and calculating a pooled  
26  
27 228 estimate for the remainder of the studies.  
28  
29  
30  
31  
32  
33  
34  
35

36 229 If any other subgroup/sensitivity analyses are identified during the process of the meta-  
37  
38 230 analysis, these will be clearly labeled as post hoc analyses.  
39  
40  
41

42 231

43  
44  
45  
46 232 **Risk of bias (quality) assessment**  
47

48  
49 233 The quality of cohort and case-control studies will be assessed using the Newcastle-  
50  
51 234 Ottawa Scale (NOS) <sup>30</sup>, which evaluates the selection of study groups (1 star for each  
52  
53 235 term), comparability (up to 2 stars), and exposure or outcome (1 star for each term)  
54  
55 236 (Supplemental table 3). A high score indicates a low risk of bias. Additionally, cross-  
56  
57  
58  
59  
60

sectional studies will be assessed using the Agency for Healthcare Research and Quality (AHRQ)-recommended eleven items scale (Supplemental table 4)<sup>31</sup>. Furthermore, the Grading of Recommendations Assessment, Development and Evaluation (GRADE) methodology will be used to evaluate the overall likelihood of quality by examining 6 types of bias in each study (selection, exposure, outcome, analytic, attrition, and confounding) (Supplemental table 5)<sup>32</sup>. The GRADE classifies the quality of studies as low, moderate, and high. The quality assessment of each study will be independently carried out by two authors, and any disagreements will be resolved through discussion (with a third author when necessary). We will use funnel plots to assess publication bias, and Egger's linear regression will be applied to test for funnel plot asymmetry.

247

#### 248 **Strategy for data synthesis**

The overall pooled estimates for the association between HDP and asthma will be calculated in the meta-analysis. We will use the generic inverse variance method to determine both the crude and adjusted results. A summary OR estimate with a 95% CI will be calculated by using fixed-effect and random effects models. The *I*-squared statistic will be applied to examine heterogeneity. According to the Cochrane Handbook criteria, if the *I*-squared value is less than 50%, heterogeneity is low, and a fixed-effect model will be used in the analysis. Otherwise, the heterogeneity will be considered high if the *I*-squared value is 50% or more, and a random effects model will

1  
2  
3  
4  
5  
6  
7  
8  
9  
10  
11  
12  
13  
14  
15  
16  
17  
18  
19  
20  
21  
22  
23  
24  
25  
26  
27  
28  
29  
30  
31  
32  
33  
34  
35  
36  
37  
38  
39  
40  
41  
42  
43  
44  
45  
46  
47  
48  
49  
50  
51  
52  
53  
54  
55  
56  
57  
58  
59  
60

257 be used. Forest plots will be constructed to show the study-specific RR/OR estimates  
258 and pooled RR/OR estimates. If a study is eligible for inclusion in the systematic review  
259 but does not provide adequate data for inclusion in the meta-analysis, a narrative  
260 synthesis will be conducted to summarize and tabulate the results. All analyses will be  
261 performed in STATA 14 and RevMan 5.3.

262  
**263 Presenting and reporting the results**

264 The study selection procedure will be outlined by a flow diagram according to the  
265 PRISMA statement in the meta-analysis (Supplemental figure 1). In addition, the  
266 reason for excluding studies will be presented. The characteristics of each included  
267 study, including the population, age range of participants, sample size, year range of  
268 studies, study design, country, exposure, outcome, measure of effect, unadjusted or  
269 adjusted effects (95% CI), and adjustment for covariates, will be tabulated in detail.  
270 The heterogeneity of the results will be listed in another table. Additionally, we will use  
271 forest plots to present the pooled estimates in the meta-analysis. Eligible studies for  
272 which we could not obtain raw data by contacting the corresponding authors will be  
273 listed individually in a separate table.

**274 Patient and public involvement**

275 This systematic review and meta-analysis will be based on published studies; therefore,  
276 primary patient data will not be collected. Patients and the public will not be involved  
277 in the study design, recruitment and data analysis.

278

## 279 **Summary**

280 In this systematic review and meta-analysis, we will assess the association between  
281 HDP and asthma in offspring by summarizing the existing literature based on a  
282 predesigned protocol. Our results might help reveal the potential etiology of asthma  
283 involving fetal lung and immune system development during the prenatal period. Thus,  
284 the supporting evidence may promote strengthened surveillance of HDP-exposed  
285 infants, leading to early identification and intervention and improved lung function and  
286 asthma outcomes.

287

## 288 **Ethics and dissemination**

289 There is no requirement for ethics approval because the meta-analysis and systematic  
290 review will be based on published data. It is anticipated that the dissemination of results  
291 will take place at conferences and through publication in a peer-reviewed journal.

292

1  
2  
3  
4  
5  
6  
7  
8  
9  
10  
11  
12  
13  
14  
15  
16  
17  
18  
19  
20  
21  
22  
23  
24  
25  
26  
27  
28  
29  
30  
31  
32  
33  
34  
35  
36  
37  
38  
39  
40  
41  
42  
43  
44  
45  
46  
47  
48  
49  
50  
51  
52  
53  
54  
55  
56  
57  
58  
59  
60

293     **Acknowledgments**

294     We acknowledge suggestions from Imti Choonara (Emeritus Professor in Child  
295     Health and Editor in Chief of BMJ Paeds Open, University of Nottingham, the  
296     Medical School, Derby, UK) on the conception and design of the analysis as well as  
297     other valuable advice regarding this manuscript.

298     **Author contributions**

299     The study was conceived by PL and TX. PL, TX, and YH developed the eligibility  
300     criteria, search strategy, assessment of methodological quality, data extraction methods  
301     and data summary plan. PL and TX wrote the protocol. TX supervised the work. All  
302     authors approved the final version.

303     **Funding**

304     This work is supported by the National Science Foundation of China (No. 81300525 to Tao  
305     Xiong , No. 81701540 to Ping Li), the Deep Underground Space Medical Center (No.  
306     DUGM201809 to Tao Xiong), and Fundamental Research Funds for the Central Universities  
307     (to Tao Xiong).

308     **Competing interests**

309     None declared.

310

## References

1. Gillon TE, Pels A, Dadelszen PV, et al. Hypertensive disorders of pregnancy: A systematic review of international clinical practice guidelines. *Plos One* 2014;9(12):122-22.
2. Olson-Chen C, Seligman NS. Hypertensive Emergencies in Pregnancy. *Critical Care Clinics* 2016;32(1):29-41.
3. Obstetriciansgynecologists ACO. Hypertension in pregnancy. Report of the American College of Obstetricians and Gynecologists' Task Force on Hypertension in Pregnancy. *Obstetrics & Gynecology* 2013;122(5):1122-31.
4. Stokholm J, Sevelsted A, Anderson UD, et al. Preeclampsia Associates with Asthma, Allergy, and Eczema in Childhood. *Am J Respir Crit Care Med* 2017;195(5):614-21.
5. Pinheiro TV, Brunetto S, Ramos JG, et al. Hypertensive disorders during pregnancy and health outcomes in the offspring: a systematic review. *J Dev Orig Health Dis* 2016;7(4):391-407.
6. Boyd HA, Basit S, Behrens I, et al. Association Between Fetal Congenital Heart Defects and Maternal Risk of Hypertensive Disorders of Pregnancy in the Same Pregnancy and Across Pregnancies. *Circulation* 2017;136(1):39-48.
7. Zheng JS, Liu H, Ong KK, et al. Maternal Blood Pressure Rise During Pregnancy and Offspring Obesity Risk at 4 to 7 Years Old: The Jia xing Birth Cohort. *J Clin Endocrinol Metab* 2017;102(11):4315-22.

1  
2  
3  
4  
5  
6  
7  
8  
9  
10  
11  
12  
13  
14  
15  
16  
17  
18  
19  
20  
21  
22  
23  
24  
25  
26  
27  
28  
29  
30  
31  
32  
33  
34  
35  
36  
37  
38  
39  
40  
41  
42  
43  
44  
45  
46  
47  
48  
49  
50  
51  
52  
53  
54  
55  
56  
57  
58  
59  
60

330 8. Tuovinen S, Eriksson JG, Kajantie E, et al. Maternal hypertensive pregnancy disorders and  
331 cognitive functioning of the offspring: a systematic re view. *J Am Soc Hypertens*  
332 2014;8(11):832-47.e1.

333 9. Maher GM, O'Keeffe GW, Kearney PM, et al. Association of Hypertensive Disorders of  
334 Pregnancy With Risk of Neurodevelopmental Disorders in Offsp ring: A Systematic Review  
335 and Meta-analysis. *JAMA Psychiatry* 2018;75(8):809-19.

336 10. Gillman MW. Developmental origins of health and disease. *N Engl J Med*  
337 2005;353(17):1848-50.

338 11. Bousquet J, Anto JM, Berkouk K, et al. Developmental determinants in non-communicable  
339 chronic diseases and ageing. *Thorax* 2015;70(6):595-7.

340 12. Boulet LP, Reddel H, Bateman E, et al. The Global Initiative for Asthma (GINA): 25 years  
341 later. *Eur Respir J* 2019; 54(2). doi:10.1183/13993003.00598-2019.

342 13. Huang K, Yang T, Xu J, et al. Prevalence, risk factors, and management of asthma in  
343 China: a national cross-sectional study. *Lancet* 2019; 394(10196): 407-18.

344 14. Cookson W. The alliance of genes and environment in asthma and allergy. *Nature*  
345 1999;402(6760 Suppl):B5-11.

346 15. Kleeberger SR, Peden D. Gene-environment interactions in asthma and other respiratory  
347 diseases. *Annu Rev Med* 2005;56:383-400.

348 16. Matthew M, Denise F, Shaun H, et al. The global burden of asthma: executive summary of

- the GINA Dissemination Committee report. *Allergy* 2004;59(5):469-78.
17. Bobolea I, Arismendi E, Valero A, et al. Early Life Origins of Asthma: A Review of Potential Effectors. *J Investig Allergol Clin Immunol* 2019;29(3):168-79.
18. Haland G, Carlsen KC, Sandvik L, et al. Reduced lung function at birth and the risk of asthma at 10 years of age. *N Engl J Med* 2006;355(16):1682-9.
19. Harding R, Maritz G. Maternal and fetal origins of lung disease in adulthood. *Semin Fetal Neonatal Med* 2012;17(2):67-72.
20. Postma DS, Bush A, van den Berge M. Risk factors and early origins of chronic obstructive pulmonary disease. *Lancet* 2015;385(9971):899-909.
21. Simpson CR, Sheikh A. Trends in the epidemiology of asthma in England: a national study of 333,294 patients. *J R Soc Med* 2010;103(3):98-106.
22. Liu X, Olsen J, Agerbo E, et al. Maternal preeclampsia and childhood asthma in the offspring. *Pediatr Allergy Immunol* 2015;26(2):181-5.
23. Byberg KK, Ogland B, Eide GE, et al. Birth after preeclamptic pregnancies: association with allergic sensitization and allergic rhinoconjunctivitis in late childhood; a historically matched cohort study. *BMC Pediatr* 2014;14:101-7.
24. Magee LA, Pels A, Helewa M, et al. Diagnosis, evaluation, and management of the hypertensive disorders of pregnancy: executive summary. *J Obstet Gynaecol Can* 2014;36(5):416-41.

1  
2  
3  
4  
5  
6  
7  
8  
9  
10  
11  
12  
13  
14  
15  
16  
17  
18  
19  
20  
21  
22  
23  
24  
25  
26  
27  
28  
29  
30  
31  
32  
33  
34  
35  
36  
37  
38  
39  
40  
41  
42  
43  
44  
45  
46  
47  
48  
49  
50  
51  
52  
53  
54  
55  
56  
57  
58  
59  
60

368 25. Lowe SA, Bowyer L, Lust K, et al. SOMANZ guidelines for the management of  
369 hypertensive disorders of pregnancy 2014. *Aust N Z J Obstet Gynaecol* 2015;55(5):e1-29.

370 26. Brown MA, Magee LA, Kenny LC, et al. Hypertensive Disorders of Pregnancy: ISSHP  
371 Classification, Diagnosis, and Management Recommendations for International Practice.  
372 *Hypertension* 2018;72(1):24-43.

373 27. Papadopoulos NG, Arakawa H, Carlsen KH, et al. International consensus on (ICON)  
374 pediatric asthma. *Allergy* 2012;67(8):976-97.

375 28. Moher D, Shamseer L, Clarke M, et al. Preferred reporting items for systematic review and  
376 meta-analysis protocols (PRISMA-P) 2015 statement. *Systematic reviews* 2015;4:1. doi:  
377 10.1186/2046-4053-4-1

378 29. Stroup DF, Berlin JA, Morton SC, et al. Meta-analysis of observational studies in  
379 epidemiology: a proposal for reporting. Meta-analysis Of Ob servational Studies in  
380 Epidemiology (MOOSE) group. *Jama* 2000;283(15):2008-12.

381 30. Andreas S. Critical evaluation of the Newcastle-Ottawa scale for the assessment of the  
382 quality of nonrandomized studies in meta-analyses. *European Journal of Epidemiology*  
383 2010;25(9):603-05.

384 31. Miller FP, Vandome AF, Mcbrewster J. Agency for healthcare research and quality2001.

385 32. Angela KH, Meerpohl JJ, Gerald G, et al. [GRADE guidelines: 14. Going from evidence to  
386 recommendations: the significance and presentation of recommendations]. *Zeitschrift Fur*

387 *Evidenz Fortbildung Und Qualitat Im Gesundheitswesen* 2013;66(7):719-25.

388

For peer review only

Supplemental figure 1. Flow Diagram of Studies Selected for Inclusion in the Systematic Review (PRISMA 2009 Flow Diagram)

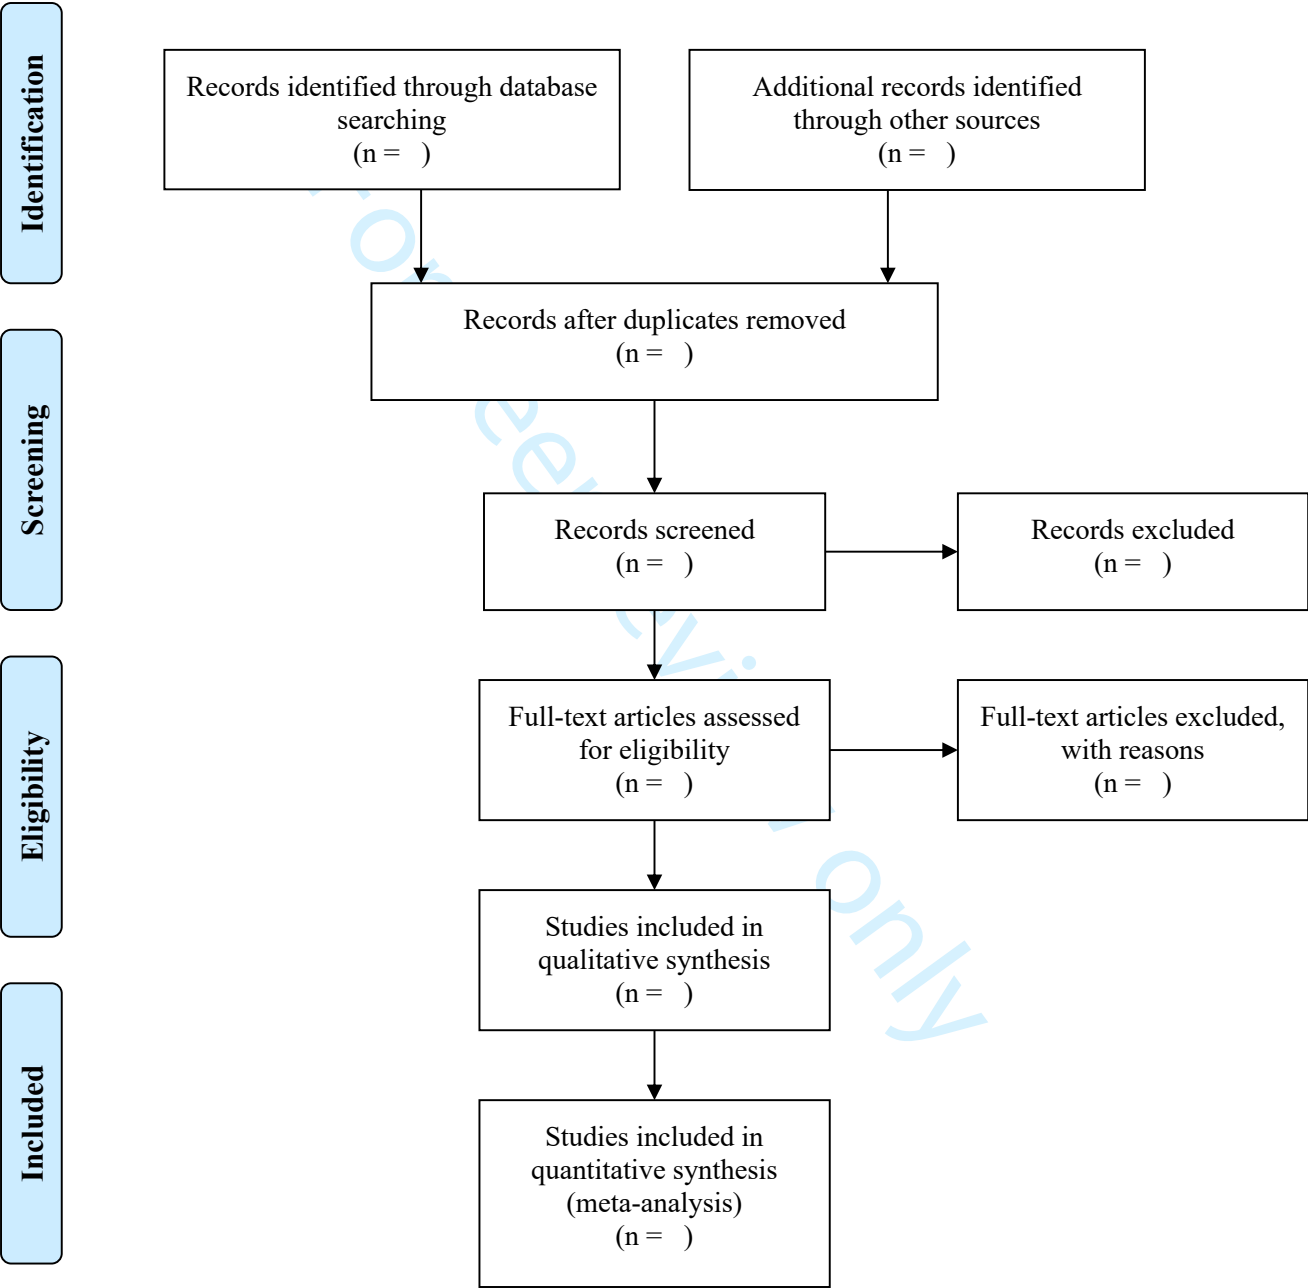

From: Moher D, Liberati A, Tetzlaff J, Altman DG, The PRISMA Group (2009). Preferred Reporting Items for Systematic Reviews and Meta-Analyses: The PRISMA Statement. PLoS Med 6(7): e1000097. doi:10.1371/journal.pmed1000097

For more information, visit [www.prisma-statement.org](http://www.prisma-statement.org).

**Supplemental table 1. Search strategy (for each electronic database to be searched)**

| #1 | Search terms                                                                            | No of records returned |
|----|-----------------------------------------------------------------------------------------|------------------------|
| 1  | hypertensive disorders during pregnancy                                                 |                        |
| 2  | hypertensive disorders in pregnancy                                                     |                        |
| 3  | hypertensive disorders of pregnancy                                                     |                        |
| 4  | pregnancy-induced hypertension                                                          |                        |
| 5  | eclampsia                                                                               |                        |
| 6  | pre-eclampsia                                                                           |                        |
| 7  | preeclampsia                                                                            |                        |
| 8  | preeclamptic pregnancy                                                                  |                        |
| 9  | chronic hypertension                                                                    |                        |
| 10 | gestational hypertension                                                                |                        |
| 11 | chronic hypertension with superimposed preeclampsia                                     |                        |
| 12 | postpartum hypertension                                                                 |                        |
| 13 | gravid hypertension                                                                     |                        |
| 14 | maternal hypertensive disorders                                                         |                        |
| 15 | (#1 OR #2 OR #3 OR #4 OR #5 OR #6 OR #7 OR #8 OR #9 OR #10 OR #11 OR #12 OR #13 OR #14) |                        |
| 16 | asthma                                                                                  |                        |
| 17 | wheeze                                                                                  |                        |
| 18 | wheezing                                                                                |                        |
| 19 | shortness of breath                                                                     |                        |
| 20 | bronchial spasm                                                                         |                        |
| 21 | bronchospasm                                                                            |                        |
| 22 | bronchoconstriction                                                                     |                        |
| 23 | bronchoconstrict                                                                        |                        |
| 24 | bronchial hyperreactivity                                                               |                        |
| 25 | bronchial hyperresponsiveness                                                           |                        |

|    |                                                                                                            |  |
|----|------------------------------------------------------------------------------------------------------------|--|
| 26 | reactive airway disease                                                                                    |  |
| 27 | obstructive lung disease                                                                                   |  |
| 28 | air low limitation                                                                                         |  |
| 29 | chronic obstructive respiratory disorder                                                                   |  |
| 30 | chronic obstructive pulmonary disease                                                                      |  |
| 31 | (#16 OR #17 OR #18 OR #19 OR #20 OR #21 OR #22 OR #23<br>OR #24 OR #25 OR #26 OR #27 OR #28 OR #29 OR #30) |  |
| 32 | (#15 AND #31)                                                                                              |  |
| 33 | limit #32 to English language                                                                              |  |
| 34 | limit #33 to humans                                                                                        |  |

**Supplemental table 2. Data Extraction Form for Review and meta-analysis**

| Study Details                              |                                                                   |
|--------------------------------------------|-------------------------------------------------------------------|
| <b>General information</b>                 |                                                                   |
| • First author                             |                                                                   |
| • Year of publication                      |                                                                   |
| • Study location                           |                                                                   |
| • Study duration                           |                                                                   |
| <b>Study eligibility</b>                   |                                                                   |
| • Study design (case-control, cohort)      |                                                                   |
| • Participants                             |                                                                   |
| exposed group                              |                                                                   |
| unexposed group                            |                                                                   |
| • Inclusion criteria                       |                                                                   |
| • Exclusion criteria                       |                                                                   |
| • Ascertainment of exposure                |                                                                   |
| • Outcome diagnostic criteria              |                                                                   |
| • Confounding variables                    |                                                                   |
| • Matching factors                         |                                                                   |
| Include or exclude                         | Include <input type="checkbox"/> exclude <input type="checkbox"/> |
| Reason for exclusion                       |                                                                   |
| <b>Characteristics of included studies</b> |                                                                   |
| • Sample size                              |                                                                   |
| exposed group (including subgroups)        |                                                                   |
| unexposed group                            |                                                                   |
| • Data source                              |                                                                   |
| • Race                                     |                                                                   |
| • Income level of country                  |                                                                   |
| • Maternal adjusted factors                |                                                                   |
| Maternal age, yrs                          |                                                                   |

|                                             |  |
|---------------------------------------------|--|
| Educational level                           |  |
| Maternal asthma                             |  |
| Maternal body mass index, kg/m <sup>2</sup> |  |
| Gestational weight gain, kg                 |  |
| Parity                                      |  |
| Maternal smoking                            |  |
| Others                                      |  |
| •Children`s adjusted factors                |  |
| Gender (M/F)                                |  |
| Birth weight, kg                            |  |
| Gestational age, w                          |  |
| Offspring age at diagnosis, yrs             |  |
| Others                                      |  |
| <b>Main outcome</b>                         |  |
| Effect estimates (RR or OR) with 95% CI     |  |
| Mean difference                             |  |
| Other findings                              |  |

**Other information**

|                                                       |                                       |
|-------------------------------------------------------|---------------------------------------|
|                                                       | Description as stated in report/paper |
| Key conclusions                                       |                                       |
| Study funding sources                                 |                                       |
| Conflicts of interest                                 |                                       |
| References to other relevant studies                  |                                       |
| Correspondence required for further study information |                                       |

### Supplemental table 3. Newcastle-Ottawa scale (NOS)

#### Supplemental table 3.1 Newcastle-Ottawa Scale (NOS) – for cohort study

| Study | Item & score                                 |                                         |                               |                                                                              |                                                                       |                           |                                                     |                                      |
|-------|----------------------------------------------|-----------------------------------------|-------------------------------|------------------------------------------------------------------------------|-----------------------------------------------------------------------|---------------------------|-----------------------------------------------------|--------------------------------------|
|       | Representativeness of the exposed cohort (1) | Selection of the non-exposed cohort (1) | Ascertainment of exposure (1) | Demonstration that outcome of interest was not present at start of study (1) | Compare ability of cohorts on the basis of the design or analysis (2) | Assessment of outcome (1) | Was follow up long enough for outcomes to occur (1) | Adequacy of follow up of cohorts (1) |
|       |                                              |                                         |                               |                                                                              |                                                                       |                           |                                                     |                                      |
|       |                                              |                                         |                               |                                                                              |                                                                       |                           |                                                     |                                      |
|       |                                              |                                         |                               |                                                                              |                                                                       |                           |                                                     |                                      |
|       |                                              |                                         |                               |                                                                              |                                                                       |                           |                                                     |                                      |
|       |                                              |                                         |                               |                                                                              |                                                                       |                           |                                                     |                                      |
|       |                                              |                                         |                               |                                                                              |                                                                       |                           |                                                     |                                      |

#### Supplemental table 3.2 Newcastle-Ottawa Scale (NOS) – for case-control study

| Study | Item & score                         |                                     |                           |                            |                                                                                |                               |                                                         |                       |
|-------|--------------------------------------|-------------------------------------|---------------------------|----------------------------|--------------------------------------------------------------------------------|-------------------------------|---------------------------------------------------------|-----------------------|
|       | Is the case definition adequate? (1) | Representativeness of the cases (1) | Selection of Controls (1) | Definition of Controls (1) | Comparability of cases and controls on the basis of the design or analysis (2) | Ascertainment of exposure (1) | Same method of ascertainment for cases and controls (1) | Non-Response rate (1) |
|       |                                      |                                     |                           |                            |                                                                                |                               |                                                         |                       |
|       |                                      |                                     |                           |                            |                                                                                |                               |                                                         |                       |
|       |                                      |                                     |                           |                            |                                                                                |                               |                                                         |                       |
|       |                                      |                                     |                           |                            |                                                                                |                               |                                                         |                       |
|       |                                      |                                     |                           |                            |                                                                                |                               |                                                         |                       |
|       |                                      |                                     |                           |                            |                                                                                |                               |                                                         |                       |

**Supplemental 3.3 NEWCASTLE - OTTAWA QUALITY ASSESSMENT SCALE  
COHORT STUDIES**

Note: A study can be awarded a maximum of one star for each numbered item within the Selection and Outcome categories. A maximum of two stars can be given for Comparability

**Selection**

- 1) Representativeness of the exposed cohort
  - a) truly representative of the average \_\_\_\_\_ (describe) in the community ★
  - b) somewhat representative of the average \_\_\_\_\_ in the community ★
  - c) selected group of users eg nurses, volunteers
  - d) no description of the derivation of the cohort
- 2) Selection of the non exposed cohort
  - a) drawn from the same community as the exposed cohort ★
  - b) drawn from a different source
  - c) no description of the derivation of the non exposed cohort
- 3) Ascertainment of exposure
  - a) secure record (eg surgical records) ★
  - b) structured interview ★
  - c) written self report
  - d) no description
- 4) Demonstration that outcome of interest was not present at start of study
  - a) yes ★
  - b) no

**Comparability**

- 1) Comparability of cohorts on the basis of the design or analysis
  - a) study controls for \_\_\_\_\_ (select the most important factor) ★
  - b) study controls for any additional factor ★ (This criteria could be modified to indicate specific control for a second important factor.)

**Outcome**

- 1) Assessment of outcome
  - a) independent blind assessment ★
  - b) record linkage ★
  - c) self report
  - d) no description
- 2) Was follow-up long enough for outcomes to occur
  - a) yes (select an adequate follow up period for outcome of interest) ★
  - b) no
- 3) Adequacy of follow up of cohorts
  - a) complete follow up - all subjects accounted for ★
  - b) subjects lost to follow up unlikely to introduce bias - small number lost - > \_\_\_\_\_ % (select an adequate %) follow up, or description provided of those lost) ★
  - c) follow up rate < \_\_\_\_\_ % (select an adequate %) and no description of those lost
  - d) no statement

### Supplemental 3.4 NEWCASTLE - OTTAWA QUALITY ASSESSMENT SCALE CASE CONTROL STUDIES

Note: A study can be awarded a maximum of one star for each numbered item within the Selection and Exposure categories. A maximum of two stars can be given for Comparability.

#### Selection

- 1) Is the case definition adequate?
  - a) yes, with independent validation \*
  - b) yes, eg record linkage or based on self reports
  - c) no description
- 2) Representativeness of the cases
  - a) consecutive or obviously representative series of cases \*
  - b) potential for selection biases or not stated
- 3) Selection of Controls
  - a) community controls \*
  - b) hospital controls
  - c) no description
- 4) Definition of Controls
  - a) no history of disease (endpoint) \*
  - b) no description of source

#### Comparability

- 1) Comparability of cases and controls on the basis of the design or analysis
  - a) study controls for \_\_\_\_\_ (Select the most important factor.) \*
  - b) study controls for any additional factor \* (This criteria could be modified to indicate specific control for a second important factor.)

#### Exposure

- 1) Ascertainment of exposure
  - a) secure record (eg surgical records) \*
  - b) structured interview where blind to case/control status \*
  - c) interview not blinded to case/control status
  - d) written self report or medical record only
  - e) no description
- 2) Same method of ascertainment for cases and controls
  - a) yes \*
  - b) no
- 3) Non-Response rate
  - a) same rate for both groups \*
  - b) non respondents described
  - c) rate different and no designation

**Supplemental table 4. Agency for Healthcare Research and Quality (AHQR) scale for cross-sectional study**

| Item                                                                                                                                | Yes | No | Unclear |
|-------------------------------------------------------------------------------------------------------------------------------------|-----|----|---------|
| 1) Define the source of information (survey, record review)                                                                         |     |    |         |
| 2) List inclusion and exclusion criteria for exposed and unexposed subjects (cases and controls) or refer to previous publications  |     |    |         |
| 3) Indicate time period used for identifying patients                                                                               |     |    |         |
| 4) Indicate whether or not subjects were consecutive if not population-based                                                        |     |    |         |
| 5) Indicate if evaluators of subjective components of study were masked to other aspects of the status of the participants          |     |    |         |
| 6) Describe any assessments undertaken for quality assurance purposes (e.g., test/retest of primary outcome measurements)           |     |    |         |
| 7) Explain any patient exclusions from analysis                                                                                     |     |    |         |
| 8) Describe how confounding was assessed and/or controlled                                                                          |     |    |         |
| 9) If applicable, explain how missing data were handled in the analysis                                                             |     |    |         |
| 10) Summarize patient response rates and completeness of data collection                                                            |     |    |         |
| 11) Clarify what follow-up, if any, was expected and the percentage of patients for which incomplete data or follow-up was obtained |     |    |         |

## Supplemental table 5. GRADE assessment

### Supplemental table 5.1 The Summary of Findings Tables

| Outcomes | No of Participants (studies)<br>Follow up | Quality of the evidence<br>(GRADE) | Relative effect (95%<br>CI) | Overall results |
|----------|-------------------------------------------|------------------------------------|-----------------------------|-----------------|
|          |                                           |                                    |                             |                 |
|          |                                           |                                    |                             |                 |
|          |                                           |                                    |                             |                 |
|          |                                           |                                    |                             |                 |

### Supplemental table 5.2 GRADE Evidence Profile

| Quality assessment |        |              |               |              |             |                      | No. of patients |          | Effect            | Quality |
|--------------------|--------|--------------|---------------|--------------|-------------|----------------------|-----------------|----------|-------------------|---------|
| No. of studies     | Design | Risk of bias | Inconsistency | Indirectness | Imprecision | Other considerations | HDP             | Controls | Relative (95% CI) |         |
| Outcome 1          |        |              |               |              |             |                      |                 |          |                   |         |
|                    |        |              |               |              |             |                      |                 |          |                   |         |
| Outcome 2          |        |              |               |              |             |                      |                 |          |                   |         |
|                    |        |              |               |              |             |                      |                 |          |                   |         |
| Outcome 3          |        |              |               |              |             |                      |                 |          |                   |         |
|                    |        |              |               |              |             |                      |                 |          |                   |         |

# Reporting checklist for protocol of a systematic review.

Based on the PRISMA-P guidelines.

## Instructions to authors

Complete this checklist by entering the page numbers from your manuscript where readers will find each of the items listed below.

Your article may not currently address all the items on the checklist. Please modify your text to include the missing information. If you are certain that an item does not apply, please write "n/a" and provide a short explanation.

Upload your completed checklist as an extra file when you submit to a journal.

In your methods section, say that you used the PRISMA-Preorting guidelines, and cite them as:

Moher D, Shamseer L, Clarke M, Ghersi D, Liberati A, Petticrew M, Shekelle P, Stewart LA. Preferred Reporting Items for Systematic Review and Meta-Analysis Protocols (PRISMA-P) 2015 statement. Syst Rev. 2015;4(1):1.

|                     |                     | Reporting Item                                                                                                                            | Page Number         |
|---------------------|---------------------|-------------------------------------------------------------------------------------------------------------------------------------------|---------------------|
| <b>Title</b>        |                     |                                                                                                                                           |                     |
| Identification      | <a href="#">#1a</a> | Identify the report as a protocol of a systematic review                                                                                  | 1                   |
| Update              | <a href="#">#1b</a> | If the protocol is for an update of a previous systematic review, identify as such                                                        | 2                   |
| <b>Registration</b> |                     |                                                                                                                                           |                     |
|                     | <a href="#">#2</a>  | If registered, provide the name of the registry (such as PROSPERO) and registration number                                                | n/a<br>under review |
| <b>Authors</b>      |                     |                                                                                                                                           |                     |
| Contact             | <a href="#">#3a</a> | Provide name, institutional affiliation, e-mail address of all protocol authors; provide physical mailing address of corresponding author | 1                   |
| Contribution        | <a href="#">#3b</a> | Describe contributions of protocol authors and identify the guarantor of the review                                                       | 16                  |

## Amendments

|                    |                                                                                                                                                                                                 |   |
|--------------------|-------------------------------------------------------------------------------------------------------------------------------------------------------------------------------------------------|---|
| <a href="#">#4</a> | If the protocol represents an amendment of a previously completed or published protocol, identify as such and list changes; otherwise, state plan for documenting important protocol amendments | 2 |
|--------------------|-------------------------------------------------------------------------------------------------------------------------------------------------------------------------------------------------|---|

## Support

|                           |                     |                                                                                                      |   |
|---------------------------|---------------------|------------------------------------------------------------------------------------------------------|---|
| Sources                   | <a href="#">#5a</a> | Indicate sources of financial or other support for the review                                        | 1 |
| Sponsor                   | <a href="#">#5b</a> | Provide name for the review funder and / or sponsor                                                  | 1 |
| Role of sponsor or funder | <a href="#">#5c</a> | Describe roles of funder(s), sponsor(s), and / or institution(s), if any, in developing the protocol | 1 |

## Introduction

|            |                    |                                                                                                                                                          |     |
|------------|--------------------|----------------------------------------------------------------------------------------------------------------------------------------------------------|-----|
| Rationale  | <a href="#">#6</a> | Describe the rationale for the review in the context of what is already known                                                                            | 5-6 |
| Objectives | <a href="#">#7</a> | Provide an explicit statement of the question(s) the review will address with reference to participants, interventions, comparators, and outcomes (PICO) | 7   |

## Methods

|                                   |                      |                                                                                                                                                                                                                               |       |
|-----------------------------------|----------------------|-------------------------------------------------------------------------------------------------------------------------------------------------------------------------------------------------------------------------------|-------|
| Eligibility criteria              | <a href="#">#8</a>   | Specify the study characteristics (such as PICO, study design, setting, time frame) and report characteristics (such as years considered, language, publication status) to be used as criteria for eligibility for the review | 11-12 |
| Information sources               | <a href="#">#9</a>   | Describe all intended information sources (such as electronic databases, contact with study authors, trial registers or other grey literature sources) with planned dates of coverage                                         | 10-11 |
| Search strategy                   | <a href="#">#10</a>  | Present draft of search strategy to be used for at least one electronic database, including planned limits, such that it could be repeated                                                                                    | 10-11 |
| Study records - data management   | <a href="#">#11a</a> | Describe the mechanism(s) that will be used to manage records and data throughout the review                                                                                                                                  | 11    |
| Study records - selection process | <a href="#">#11b</a> | State the process that will be used for selecting studies (such as two independent reviewers) through each phase of the review                                                                                                | 11-12 |

(that is, screening, eligibility and inclusion in meta-analysis)

|    |                      |                      |                                                                         |       |
|----|----------------------|----------------------|-------------------------------------------------------------------------|-------|
| 1  |                      |                      |                                                                         |       |
| 2  |                      |                      |                                                                         |       |
| 3  | Study records - data | <a href="#">#11c</a> | Describe planned method of extracting data from reports (such as        | 11-12 |
| 4  | collection process   |                      | piloting forms, done independently, in duplicate), any processes        |       |
| 5  |                      |                      | for obtaining and confirming data from investigators                    |       |
| 6  |                      |                      |                                                                         |       |
| 7  |                      |                      |                                                                         |       |
| 8  | Data items           | <a href="#">#12</a>  | List and define all variables for which data will be sought (such       | 11-12 |
| 9  |                      |                      | as PICO items, funding sources), any pre-planned data                   |       |
| 10 |                      |                      | assumptions and simplifications                                         |       |
| 11 |                      |                      |                                                                         |       |
| 12 |                      |                      |                                                                         |       |
| 13 | Outcomes and         | <a href="#">#13</a>  | List and define all outcomes for which data will be sought,             | 8-9   |
| 14 | prioritization       |                      | including prioritization of main and additional outcomes, with          |       |
| 15 |                      |                      | rationale                                                               |       |
| 16 |                      |                      |                                                                         |       |
| 17 |                      |                      |                                                                         |       |
| 18 | Risk of bias in      | <a href="#">#14</a>  | Describe anticipated methods for assessing risk of bias of              | 12-13 |
| 19 | individual studies   |                      | individual studies, including whether this will be done at the          |       |
| 20 |                      |                      | outcome or study level, or both; state how this information will        |       |
| 21 |                      |                      | be used in data synthesis                                               |       |
| 22 |                      |                      |                                                                         |       |
| 23 |                      |                      |                                                                         |       |
| 24 |                      |                      |                                                                         |       |
| 25 | Data synthesis       | <a href="#">#15a</a> | Describe criteria under which study data will be quantitatively         | 13-14 |
| 26 |                      |                      | synthesised                                                             |       |
| 27 |                      |                      |                                                                         |       |
| 28 |                      |                      |                                                                         |       |
| 29 | Data synthesis       | <a href="#">#15b</a> | If data are appropriate for quantitative synthesis, describe            | 13-14 |
| 30 |                      |                      | planned summary measures, methods of handling data and                  |       |
| 31 |                      |                      | methods of combining data from studies, including any planned           |       |
| 32 |                      |                      | exploration of consistency (such as I <sup>2</sup> , Kendall's $\tau$ ) |       |
| 33 |                      |                      |                                                                         |       |
| 34 |                      |                      |                                                                         |       |
| 35 |                      |                      |                                                                         |       |
| 36 | Data synthesis       | <a href="#">#15c</a> | Describe any proposed additional analyses (such as sensitivity or       | 12    |
| 37 |                      |                      | subgroup analyses, meta-regression)                                     |       |
| 38 |                      |                      |                                                                         |       |
| 39 |                      |                      |                                                                         |       |
| 40 | Data synthesis       | <a href="#">#15d</a> | If quantitative synthesis is not appropriate, describe the type of      | 14    |
| 41 |                      |                      | summary planned                                                         |       |
| 42 |                      |                      |                                                                         |       |
| 43 |                      |                      |                                                                         |       |
| 44 | Meta-bias(es)        | <a href="#">#16</a>  | Specify any planned assessment of meta-bias(es) (such as                | 13    |
| 45 |                      |                      | publication bias across studies, selective reporting within studies)    |       |
| 46 |                      |                      |                                                                         |       |
| 47 | Confidence in        | <a href="#">#17</a>  | Describe how the strength of the body of evidence will be               | 14    |
| 48 | cumulative evidence  |                      | assessed (such as GRADE)                                                |       |
| 49 |                      |                      |                                                                         |       |
| 50 |                      |                      |                                                                         |       |

51 None The PRISMA-P checklist is distributed under the terms of the Creative Commons Attribution License  
52 CC-BY 4.0. This checklist can be completed online using <https://www.goodreports.org/>, a tool made by the  
53 EQUATOR Network in collaboration with [Penelope.ai](#)  
54  
55  
56  
57  
58  
59  
60

# BMJ Open

## Hypertensive Disorders of Pregnancy and Risk of Asthma in Offspring: Protocol for A Systematic Review and Meta-Analysis

|                                 |                                                                                                                                                                                                                                                                                                                                                                                                                                                                                                                                                                                                                                                                        |
|---------------------------------|------------------------------------------------------------------------------------------------------------------------------------------------------------------------------------------------------------------------------------------------------------------------------------------------------------------------------------------------------------------------------------------------------------------------------------------------------------------------------------------------------------------------------------------------------------------------------------------------------------------------------------------------------------------------|
| Journal:                        | <i>BMJ Open</i>                                                                                                                                                                                                                                                                                                                                                                                                                                                                                                                                                                                                                                                        |
| Manuscript ID                   | bmjopen-2019-035145.R2                                                                                                                                                                                                                                                                                                                                                                                                                                                                                                                                                                                                                                                 |
| Article Type:                   | Protocol                                                                                                                                                                                                                                                                                                                                                                                                                                                                                                                                                                                                                                                               |
| Date Submitted by the Author:   | 21-Mar-2020                                                                                                                                                                                                                                                                                                                                                                                                                                                                                                                                                                                                                                                            |
| Complete List of Authors:       | Li, Ping; West China Second University Hospital, Sichuan University, Department of Pediatrics; Key Laboratory of Birth Defects and Related Diseases of Women and Children (Sichuan University) Ministry of Education<br>Xiong, tao; West China Second University Hospital, Sichuan University, Department of Pediatrics; Key Laboratory of Birth Defects and Related Diseases of Women and Children (Sichuan University) Ministry of Education<br>Hu, Yong; West China Second University Hospital, Sichuan University, Department of Pediatrics; Key Laboratory of Birth Defects and Related Diseases of Women and Children (Sichuan University) Ministry of Education |
| <b>Primary Subject Heading</b>: | Paediatrics                                                                                                                                                                                                                                                                                                                                                                                                                                                                                                                                                                                                                                                            |
| Secondary Subject Heading:      | Research methods, Obstetrics and gynaecology, Paediatrics                                                                                                                                                                                                                                                                                                                                                                                                                                                                                                                                                                                                              |
| Keywords:                       | Asthma < THORACIC MEDICINE, Hypertension < CARDIOLOGY, PERINATOLOGY, PAEDIATRICS, Community child health < PAEDIATRICS                                                                                                                                                                                                                                                                                                                                                                                                                                                                                                                                                 |
|                                 |                                                                                                                                                                                                                                                                                                                                                                                                                                                                                                                                                                                                                                                                        |

SCHOLARONE™  
Manuscripts



I, the Submitting Author has the right to grant and does grant on behalf of all authors of the Work (as defined in the below author licence), an exclusive licence and/or a non-exclusive licence for contributions from authors who are: i) UK Crown employees; ii) where BMJ has agreed a CC-BY licence shall apply, and/or iii) in accordance with the terms applicable for US Federal Government officers or employees acting as part of their official duties; on a worldwide, perpetual, irrevocable, royalty-free basis to BMJ Publishing Group Ltd ("BMJ") its licensees and where the relevant Journal is co-owned by BMJ to the co-owners of the Journal, to publish the Work in this journal and any other BMJ products and to exploit all rights, as set out in our [licence](#).

The Submitting Author accepts and understands that any supply made under these terms is made by BMJ to the Submitting Author unless you are acting as an employee on behalf of your employer or a postgraduate student of an affiliated institution which is paying any applicable article publishing charge ("APC") for Open Access articles. Where the Submitting Author wishes to make the Work available on an Open Access basis (and intends to pay the relevant APC), the terms of reuse of such Open Access shall be governed by a Creative Commons licence – details of these licences and which [Creative Commons](#) licence will apply to this Work are set out in our licence referred to above.

Other than as permitted in any relevant BMJ Author's Self Archiving Policies, I confirm this Work has not been accepted for publication elsewhere, is not being considered for publication elsewhere and does not duplicate material already published. I confirm all authors consent to publication of this Work and authorise the granting of this licence.

# Hypertensive Disorders of Pregnancy and Risk of Asthma in Offspring: Protocol for A Systematic Review and Meta-Analysis

Ping Li, MD,<sup>1,2</sup> Tao Xiong\*, MD PhD<sup>1,2,3</sup> Yong Hu, MD<sup>1,2</sup>

<sup>1</sup> Department of Pediatrics, West China Second University Hospital, Sichuan University, Chengdu, China

<sup>2</sup> Key Laboratory of Birth Defects and Related Diseases of Women and Children (Sichuan University), Ministry of Education

<sup>3</sup> Deep Underground Space Medical Center, West China Hospital, Sichuan University, Chengdu, China

Ping Li: [liping\\_371986@163.com](mailto:liping_371986@163.com)

Yong Hu: [huyong1003@163.com](mailto:huyong1003@163.com)

## Funding

This work was supported by the National Science Foundation of China (No. 81300525 to Tao Xiong, No. 81701540 to Ping Li), the Deep Underground Space Medical Center (No. DUGM201809 to Tao Xiong), and Fundamental Research Funds for the Central Universities (to Tao Xiong).

## \*Correspondence

Dr. Tao Xiong

No. 20, Section Three, South Renmin Road, Chengdu, China

Tel: 86 13730652940

Email: [tao\\_xiong@126.com](mailto:tao_xiong@126.com)

Word count: 2290

1  
2  
3  
4  
5  
6  
7  
8  
9  
10  
11  
12  
13  
14  
15  
16  
17  
18  
19  
20  
21  
22  
23  
24  
25  
26  
27  
28  
29  
30  
31  
32  
33  
34  
35  
36  
37  
38  
39  
40  
41  
42  
43  
44  
45  
46  
47  
48  
49  
50  
51  
52  
53  
54  
55  
56  
57  
58  
59  
60

23     **ABSTRACT**

24     **Introduction:** Hypertensive disorders of pregnancy (HDP), one of the most common  
25     obstetrical complications, has been reported to have a controversial relationship with  
26     the increased risk of asthma in offspring. No systematic review of this topic has been  
27     performed. The aim of this systematic review will be to summarize the available  
28     evidence examining the association between HDP and the risk of asthma in offspring.

29     **Methods and analysis:** We will follow the Preferred Reporting Items for Systematic  
30     Reviews and Meta-Analyses (PRISMA) and Meta-analysis of Observational Studies in  
31     Epidemiology (MOOSE) guidelines. A systematic search of the PubMed, EMBASE,  
32     Cochrane and Web of Science databases will be performed using a detailed search  
33     strategy from database inception through Dec. 31, 2019. Cohort, case-control and cross-  
34     sectional studies that report a diagnosis of maternal HDP and asthma in offspring will  
35     be included. Studies will be limited to the English language and include only human  
36     participants. Two independent reviewers will conduct the study selection, data  
37     extraction, and risk of bias assessments using a standardized data extraction form. A  
38     meta-analysis will be performed to calculate overall pooled estimates using the generic  
39     inverse variance method. The data will be synthesized by either fixed-effect or random  
40     effects models according to heterogeneity tests. All analyses will be performed in  
41     STATA 14 and RevMan 5.3. High-quality evidence of the relationship between HDP  
42     and the risk of asthma in exposed offspring will be identified through the synthesis of  
43     current studies. In addition, the results of subgroup analyses and related secondary  
44     outcomes will be reported. The following will be concluded: (i) whether HDP increases

the risk of asthma in offspring; (ii) whether HDP affects the severity of asthma in exposed offspring; and (iii) whether possible differences in the risk of asthma among different HDP subgroups exist.

**Keywords:** Asthma, Hypertension, Perinatology, Pediatrics, Community child health

## **Ethics and dissemination**

There is no requirement for ethics approval because the meta-analysis and systematic review will be based on published data. It is anticipated that the dissemination of results will take place at conferences and through publication in a peer-reviewed journal.

## **Strengths and limitations of this study**

- This will be the first meta-analysis to explore the relationship between HDP and the risk of asthma in exposed offspring.
- This protocol was designed following the Preferred Reporting Items for Systematic Reviews and Meta-Analyses (PRISMA) and Meta-analysis of Observational Studies in Epidemiology (MOOSE) guidelines.
- Since there may be some potential confounding factors, we will perform detailed subgroup analyses to reduce the effects of confounding factors.

1  
2  
3  
4  
5  
6  
7  
8  
9  
10  
11  
12  
13  
14  
15  
16  
17  
18  
19  
20  
21  
22  
23  
24  
25  
26  
27  
28  
29  
30  
31  
32  
33  
34  
35  
36  
37  
38  
39  
40  
41  
42  
43  
44  
45  
46  
47  
48  
49  
50  
51  
52  
53  
54  
55  
56  
57  
58  
59  
60

- 64 ➤ Since positive results are more prone to be published  
65 online, funnel plots will be used to assess publication bias.
- 66 ➤ Selection bias will be considered because the pooled data will be obtained from  
67 observational studies.

For peer review only

## INTRODUCTION

Hypertensive disorders of pregnancy (HDP) is estimated to affect 5% to 15% of all pregnancies and is recognized as one of the most common obstetrical complications<sup>1</sup>. HDP includes any hypertensive condition before gestation or manifested before 20 weeks and hypertension starting at or after 20 weeks; types of hypertension include gestational hypertension (GH), preeclampsia (PE), chronic hypertension, and PE superimposed on chronic hypertension according to the International Society for the Study of Hypertension in Pregnancy<sup>3</sup>. Recent studies have reported that HDP is closely associated with an increased risk of diseases in offspring, including asthma, allergy, eczema<sup>4</sup>, high blood pressure<sup>5</sup>, congenital heart defects<sup>6</sup>, obesity<sup>7</sup>, autism spectrum disorder (ASD), attention-deficit/hyperactivity disorder (ADHD), low cognitive function, anxiety/depression, and other neurodevelopmental disorders<sup>8 9</sup>. The “Developmental Origins of Health and Disease (DOHaD)” hypothesis, which has been widely confirmed, suggests that fetuses exposed to adverse uterine environments are prone to develop chronic noncommunicable diseases later in life owing to perpetual alterations in the fetal vasculature, cardiac structure, pancreas, adipose tissue and brain structure<sup>10 11</sup>. In addition, HDP induces a detrimental in utero environment, with systemic inflammation and oxidative stress experienced by the fetus, thus impairing vulnerable fetal lung development and disturbing immune function, which may persist throughout life in the offspring.

Asthma, a common lung disease associated with abnormal inflammation and immune response, is characterized by variable symptoms of wheezing, shortness of

1  
2  
3  
4 90 breath, chest tightness and/or cough, and variable expiratory airflow limitation. It is a  
5  
6  
7 91 chronic disease of childhood and is responsible for the majority school absences,  
8  
9  
10 92 emergency department visits and hospitalizations. Thus, asthma has been regarded as a  
11  
12 93 major public health challenge worldwide, affecting 1-18% of populations in different  
13  
14 94 countries <sup>12 13</sup>. The development of asthma has generally been attributed to the  
15  
16  
17 95 interactions between genetics and environmental factors <sup>14 15</sup>. Currently, it is widely  
18  
19  
20 96 accepted that asthma develops early in life <sup>16</sup>. Recurrent wheezing and other asthma-  
21  
22  
23 97 like symptoms usually begin within the first few weeks or months after birth. There is  
24  
25  
26 98 increasing evidence to suggest that negative events occurring early in life, even in the  
27  
28 99 perinatal period, significantly increase the risk of asthma and poor lung function later  
29  
30  
31 100 in life <sup>17 18</sup>. Hence, adverse obstetrical events, such as HDP, may have strong effects on  
32  
33 101 fetal airway structure and lung and immune system development during the prenatal  
34  
35  
36 102 period and may significantly increase the susceptibility of offspring to asthma <sup>19 20</sup>.

37  
38 103 Approximately half of individuals with asthma are reported to have suffered from  
39  
40  
41 104 asthma-like symptoms during childhood <sup>21</sup>. Therefore, early recognition and  
42  
43  
44 105 intervention are critical to reduce short- and long-term morbidity and to prevent  
45  
46  
47 106 potential long-term sequelae resulting in impaired lung function. Recent studies have  
48  
49  
50 107 shown that HDP is a potential risk factor for childhood asthma in offspring <sup>4 22</sup>.  
51  
52 108 However, the association between HDP and asthma is controversial <sup>23</sup>. Identifying the  
53  
54  
55 109 relationship between HDP and asthma could help us to understand the pathogenesis of  
56  
57  
58 110 asthma. It also facilitates early asthma recognition and intervention in high-risk  
59  
60 111 populations. Therefore, we aim to perform a systematic review and meta-analysis to

112 summarize the available evidence regarding the relationship between HDP and asthma  
113 in offspring.

114

## 115 **OBJECTIVES**

116 The aim of the present systematic review and meta-analysis is to summarize the  
117 available evidence to explore the following:

- 118 1. Whether HDP increases the risk of asthma in offspring;
- 119 2. Whether HDP affects the severity of asthma in exposed offspring; and
- 120 3. Whether differences in the risk of asthma among different HDP subgroups exist.

121 The study will be conducted based on the following requirements.

## 122 **Population**

123 Pregnant women and their offspring at any age (both child offspring and adult  
124 offspring) will be included.

## 125 **Intervention/exposures**

126 HDP, defined as any hypertension (systolic blood pressure (BP)  $\geq 140$  and/or diastolic  
127 BP  $\geq 90$  mmHg) during pregnancy, mainly includes the following:

128 (1) GH: any hypertensive disorder that develops at or after 20 weeks of gestation in  
129 the absence of features of preeclampsia (PE);

130 (2) PE: GH accompanied by one or more of the following new-onset conditions at or  
131 after 20 weeks of gestation: (i) proteinuria, (ii) maternal organ dysfunction, such as

1  
2  
3  
4  
5  
6  
7  
8  
9  
10  
11  
12  
13  
14  
15  
16  
17  
18  
19  
20  
21  
22  
23  
24  
25  
26  
27  
28  
29  
30  
31  
32  
33  
34  
35  
36  
37  
38  
39  
40  
41  
42  
43  
44  
45  
46  
47  
48  
49  
50  
51  
52  
53  
54  
55  
56  
57  
58  
59  
60

acute kidney injury, liver complications, neurological complications, or hematological complications, and (iii) uteroplacental dysfunction;

(3) Chronic hypertension (essential and secondary): high blood pressure predating pregnancy or recognized at < 20 weeks of gestation; and

(4) PE superimposed on chronic hypertension: chronic essential hypertension accompanied by any of the above maternal organ dysfunctions consistent with PE.

The definitions were developed according to current guidelines, such as the Canadian Hypertensive Disorders of Pregnancy Working Group <sup>24</sup>, Society of Obstetric Medicine of Australia and New Zealand <sup>25</sup>, American College of Obstetricians and Gynecologists <sup>3</sup>, and International Society for the Study of Hypertension in Pregnancy guidelines <sup>26</sup>.

**Comparison**

Normotensive pregnant women will be used as the control group.

**Outcomes**

- 1. Primary outcome: asthma.
- Asthma is defined by a history of respiratory symptoms, including wheezing, shortness of breath, chest tightness and cough, that vary over time and in intensity in addition to variable expiratory airflow limitation according to the Global Initiative for Asthma (GINA) <sup>12</sup> and International Collaboration in Asthma, Allergy and Immunology (iCAALL)<sup>27</sup>.
- 2. Secondary outcomes:
- (1) Wheezing/recurrent wheezing;

(2) Lung/pulmonary function (including forced expiratory volume in one second [FEV<sub>1</sub>], forced expiratory volume at 0.5 seconds [FEV<sub>0.5</sub>], forced vital capacity [FVC], FEV<sub>1</sub>/FVC, 50% of the forced expiratory flow [FEF<sub>50</sub>] and 75% of the forced expiratory flow [FEF<sub>75</sub>], maximal midexpiratory flow [FEF<sub>25-75</sub>]), active asthma, asthma exacerbations and asthma treatment (including hospitalization, systemic corticosteroid use, inhaled  $\beta_2$ -agonist use, inhaled corticosteroid [ICS] use, combination of inhaled  $\beta_2$ -agonists and corticosteroid use, leukotriene antagonist use, and other antiasthma medication use); and

3. Serum IgE levels.

## **METHOD**

The systematic review and meta-analysis will follow the Preferred Reporting Items for Systematic Reviews and Meta-Analysis (PRISMA)<sup>28</sup> and Meta-analysis of Observational Studies in Epidemiology (MOOSE) guidelines<sup>29</sup>.

### **Criteria for considering studies for review**

#### **Inclusion criteria**

(1) Studies with cohort, case-control and cross-sectional designs that report a diagnosis of HDP and asthma in offspring as the outcome of interest;

(2) Studies that estimate the relationship between HDP and asthma and report the estimated risks (odds ratios [ORs] or relative risks [RRs]) with 95% confidence intervals (CIs) or provide sufficient information to calculate these values;

1  
2  
3  
4  
5  
6  
7  
8  
9  
10  
11  
12  
13  
14  
15  
16  
17  
18  
19  
20  
21  
22  
23  
24  
25  
26  
27  
28  
29  
30  
31  
32  
33  
34  
35  
36  
37  
38  
39  
40  
41  
42  
43  
44  
45  
46  
47  
48  
49  
50  
51  
52  
53  
54  
55  
56  
57  
58  
59  
60

175 (3) Studies published in only the English language;

176 (4) Studies published in any year; and

177 (5) Studies that include only humans.

178 **Exclusion criteria**

179 (1) Conference abstracts, letters to the editor, reviews and commentary articles;

180 (2) Studies with overlapping data; or

181 (3) Studies missing raw data.

182

183 **Search strategy**

184 A systematic search of the literature will be conducted in the PubMed, EMBASE,  
185 Cochrane and Web of Science databases from database inception through Dec. 31, 2019.  
186 We will search databases such as Google Scholar for gray literature. A three-phase  
187 search strategy will be applied in this review.

188 1. For HDP, the following combination of search terms will be used: “hypertensive  
189 disorders during pregnancy” or “hypertensive disorders in pregnancy” or “hypertensive  
190 disorders of pregnancy” or “pregnancy-induced hypertension” or “eclampsia” or  
191 “preeclampsia” or “preeclampsia” or “preeclamptic pregnancy” or “chronic  
192 hypertension” or ”gestational hypertension” or “chronic hypertension with  
193 superimposed preeclampsia” or “postpartum hypertension” or “maternal hypertensive  
194 disorders”.

1  
2  
3  
4 195 2. For asthma, the following search terms will be used: “asthma” or “wheeze” or  
5  
6 196 “wheezing” or “shortness of breath” or “bronchial spasm” or “bronchospasm” or  
7  
8  
9 197 “bronchoconstriction” or “bronchoconstrict” or “bronchial hyperreactivity” or  
10  
11  
12 198 “bronchial hyperresponsiveness” or “reactive airway disease” or “obstructive lung  
13  
14  
15 199 disease” or “air low limitation” or “chronic obstructive respiratory disorder” or “chronic  
16  
17 200 obstructive pulmonary disease”.

18  
19  
20  
21 201 3. We will combine steps 1 and 2 with “and”.

22  
23  
24 202 The detailed search strategy is listed in Supplement table 1. We will manually search  
25  
26  
27 203 the reference lists of the included studies to further identify eligible studies.  
28  
29

30  
31 204

### 32 33 34 205 **Study selection and data extraction**

35  
36  
37  
38 206 The eligibility of each study will be assessed independently by two investigators (PL  
39  
40  
41 207 and TX), and disagreements will be solved by discussion (with a third author, YH, when  
42  
43  
44 208 necessary). Data from the identified studies will be extracted using the standardized  
45  
46  
47 209 data extraction form listed in Supplement table 2. The titles and abstracts of the studies  
48  
49  
50 210 retrieved from each database will be stored and managed in the EndNote reference  
51  
52  
53 211 manager. For each included study, we will extract the following information: first  
54  
55  
56 212 author’s last name, year of publication, study location, study design, sample size,  
57  
58  
59 213 ascertainment of exposure (HDP and its subgroups), outcome diagnostic criteria,  
60 214 offspring age at diagnosis, adjusted/matched confounding variables and effects

1  
2  
3  
4  
5  
6  
7  
8  
9  
10  
11  
12  
13  
14  
15  
16  
17  
18  
19  
20  
21  
22  
23  
24  
25  
26  
27  
28  
29  
30  
31  
32  
33  
34  
35  
36  
37  
38  
39  
40  
41  
42  
43  
44  
45  
46  
47  
48  
49  
50  
51  
52  
53  
54  
55  
56  
57  
58  
59  
60

215 estimates (RRs or ORs) with 95% CIs. The eligibility of each study will be assessed  
216 independently by two investigators (PL and TX), and disagreements will be solved by  
217 discussion (with a third author, YH, when necessary).

218

219 **Subgroups/subsets**

220 Subgroup analyses will be carried out according to the following: (1) study design  
221 (cohort vs. case-control vs. cross-sectional), (2) sample size, (3) location (e.g., Europe  
222 vs. United States), (4) income level of the country (low/middle/high), (5) year of  
223 publication, (6) study subject selection, (7) study quality (minimal/low vs.  
224 moderate/high), (8) adjusted offspring factors (e.g., age at diagnosis of asthma, sex,  
225 birth weight, gestational age), and (9) adjusted maternal factors (e.g., maternal asthma,  
226 maternal body mass index, gestational weight gain, maternal smoking). Sensitivity  
227 analyses will be performed by excluding each study one by one and calculating a pooled  
228 estimate for the remainder of the studies.

229 If any other subgroup/sensitivity analyses are identified during the process of the meta-  
230 analysis, these will be clearly labeled as post hoc analyses.

231

232 **Risk of bias (quality) assessment**

233 The quality of cohort and case-control studies will be assessed using the Newcastle-  
234 Ottawa Scale (NOS) <sup>30</sup>, which evaluates the selection of study groups (1 star for each  
235 term), comparability (up to 2 stars), and exposure or outcome (1 star for each term)  
236 (Supplemental table 3). A high score indicates a low risk of bias. Additionally, cross-  
237 sectional studies will be assessed using the Agency for Healthcare Research and Quality  
238 (AHRQ)-recommended eleven items scale (Supplemental table 4) <sup>31</sup>. Furthermore, the  
239 Grading of Recommendations Assessment, Development and Evaluation (GRADE)  
240 methodology will be used to evaluate the overall likelihood of quality by examining 6  
241 types of bias in each study (selection, exposure, outcome, analytic, attrition, and  
242 confounding) (Supplemental table 5) <sup>32</sup>. The GRADE classifies the quality of studies  
243 as low, moderate, and high. The quality assessment of each study will be independently  
244 carried out by two authors, and any disagreements will be resolved through discussion  
245 (with a third author when necessary). We will use funnel plots to assess publication bias,  
246 and Egger's linear regression will be applied to test for funnel plot asymmetry.

247

## 248 **Strategy for data synthesis**

249 The overall pooled estimates for the association between HDP and asthma will be  
250 calculated in the meta-analysis. We will use the generic inverse variance method to  
251 determine both the crude and adjusted results. A summary OR estimate with a 95% CI  
252 will be calculated by using fixed-effect and random effects models. The *I*-squared  
253 statistic will be applied to examine heterogeneity. According to the Cochrane

1  
2  
3  
4  
5  
6  
7  
8  
9  
10  
11  
12  
13  
14  
15  
16  
17  
18  
19  
20  
21  
22  
23  
24  
25  
26  
27  
28  
29  
30  
31  
32  
33  
34  
35  
36  
37  
38  
39  
40  
41  
42  
43  
44  
45  
46  
47  
48  
49  
50  
51  
52  
53  
54  
55  
56  
57  
58  
59  
60

Handbook criteria, if the *I*-squared value is less than 50%, heterogeneity is low, and a fixed-effect model will be used in the analysis. Otherwise, the heterogeneity will be considered high if the *I*-squared value is 50% or more, and a random effects model will be used. Forest plots will be constructed to show the study-specific RR/OR estimates and pooled RR/OR estimates. If a study is eligible for inclusion in the systematic review but does not provide adequate data for inclusion in the meta-analysis, a narrative synthesis will be conducted to summarize and tabulate the results. All analyses will be performed in STATA 14 and RevMan 5.3.

**Presenting and reporting the results**

The study selection procedure will be outlined by a flow diagram according to the PRISMA statement in the meta-analysis (Supplemental figure 1). In addition, the reason for excluding studies will be presented. The characteristics of each included study, including the population, age range of participants, sample size, year range of studies, study design, country, exposure, outcome, measure of effect, unadjusted or adjusted effects (95% CI), and adjustment for covariates, will be tabulated in detail. The heterogeneity of the results will be listed in another table. Additionally, we will use forest plots to present the pooled estimates in the meta-analysis. Eligible studies for which we could not obtain raw data by contacting the corresponding authors will be listed individually in a separate table.

## 274 **Patient and public involvement**

275 This systematic review and meta-analysis will be based on published studies; therefore,  
276 primary patient data will not be collected. Patients and the public will not be involved  
277 in the study design, recruitment and data analysis.

278

## 279 **Summary**

280 In this systematic review and meta-analysis, we will assess the association between  
281 HDP and asthma in offspring by summarizing the existing literature based on a  
282 predesigned protocol. Our results might help reveal the potential etiology of asthma  
283 involving fetal lung and immune system development during the prenatal period. Thus,  
284 the supporting evidence may promote strengthened surveillance of HDP-exposed  
285 infants, leading to early identification and intervention and improved lung function and  
286 asthma outcomes.

287

## 288 **Acknowledgments**

289 We acknowledge suggestions from Imti Choonara (Emeritus Professor in Child  
290 Health and Editor in Chief of BMJ Paeds Open, University of Nottingham, the  
291 Medical School, Derby, UK) on the conception and design of the analysis as well as  
292 other valuable advice regarding this manuscript.

1  
2  
3  
4  
5  
6  
7  
8  
9  
10  
11  
12  
13  
14  
15  
16  
17  
18  
19  
20  
21  
22  
23  
24  
25  
26  
27  
28  
29  
30  
31  
32  
33  
34  
35  
36  
37  
38  
39  
40  
41  
42  
43  
44  
45  
46  
47  
48  
49  
50  
51  
52  
53  
54  
55  
56  
57  
58  
59  
60

293 **Author contributions**

294 The study was conceived by PL and TX. PL, TX, and YH developed the eligibility  
295 criteria, search strategy, assessment of methodological quality, data extraction methods  
296 and data summary plan. PL and TX wrote the protocol. TX supervised the work. All  
297 authors approved the final version.

298 **Funding**

299 This work is supported by the National Science Foundation of China (No. 81300525 to Tao  
300 Xiong , No. 81701540 to Ping Li), the Deep Underground Space Medical Center (No.  
301 DUGM201809 to Tao Xiong), and Fundamental Research Funds for the Central Universities  
302 (to Tao Xiong).

303 **Competing interests**

304 None declared.

305

306

307

308

309

310

## References

1. Gillon TE, Pels A, Dadelszen PV, *et al.* Hypertensive disorders of pregnancy: A systematic review of international clinical practice guidelines. *Plos One* 2014;9(12):122-22.
2. Olson-Chen C, Seligman NS. Hypertensive emergencies in pregnancy. *Critical Care Clinics* 2016;32(1):29-41.
3. Obstetriciansgynecologists ACO. Hypertension in pregnancy. Report of the American College of Obstetricians and Gynecologists' Task Force on Hypertension in Pregnancy. *Obstetrics & Gynecology* 2013;122(5):1122-31.
4. Stokholm J, Sevelsted A, Anderson UD, *et al.* Preeclampsia associates with asthma, allergy, and eczema in childhood. *Am J Respir Crit Care Med* 2017;195(5):614-21.
5. Pinheiro TV, Brunetto S, Ramos JG, *et al.* Hypertensive disorders during pregnancy and health outcomes in the offspring: a systematic review. *J Dev Orig Health Dis* 2016;7(4):391-407.
6. Boyd HA, Basit S, Behrens I, *et al.* Association between fetal congenital heart defects and maternal risk of hypertensive disorders of pregnancy in the same pregnancy and across pregnancies. *Circulation* 2017;136(1):39-48.
7. Zheng JS, Liu H, Ong KK, *et al.* Maternal blood pressure rise during pregnancy and offspring obesity risk at 4 to 7 years old: The Jia Xing Birth Cohort. *J Clin Endocrinol Metab* 2017;102(11):4315-22.
8. Tuovinen S, Eriksson JG, Kajantie E, *et al.* Maternal hypertensive pregnancy disorders and cognitive functioning of the offspring: a systematic re view. *J Am Soc Hypertens* 2014;8(11):832-47.

1  
2  
3  
4  
5  
6  
7  
8  
9  
10  
11  
12  
13  
14  
15  
16  
17  
18  
19  
20  
21  
22  
23  
24  
25  
26  
27  
28  
29  
30  
31  
32  
33  
34  
35  
36  
37  
38  
39  
40  
41  
42  
43  
44  
45  
46  
47  
48  
49  
50  
51  
52  
53  
54  
55  
56  
57  
58  
59  
60

9. Maher GM, O'Keeffe GW, Kearney PM, *et al.* Association of hypertensive disorders of pregnancy with risk of neurodevelopmental disorders in offspring: A Systematic Review and Meta-analysis. *JAMA Psychiatry* 2018;75(8):809-19.

10. Gillman MW. Developmental origins of health and disease. *N Engl J Med* 2005;353(17):1848-50.

11. Bousquet J, Anto JM, Berkouk K, *et al.* Developmental determinants in non-communicable chronic diseases and ageing. *Thorax* 2015;70(6):595-7.

12. Boulet LP, Reddel H, Bateman E, *et al.* The Global Initiative for Asthma (GINA): 25 years later. *Eur Respir J* 2019; 54(2).1900598.

13. Huang K, Yang T, Xu J, *et al.* Prevalence, risk factors, and management of asthma in China: a national cross-sectional study. *Lancet* 2019; 394(10196): 407-18.

14. Cookson W. The alliance of genes and environment in asthma and allergy. *Nature* 1999;402(6760 Suppl):B5-11.

15. Kleeberger SR, Peden D. Gene-environment interactions in asthma and other respiratory diseases. *Annu Rev Med* 2005;56:383-400.

16. Matthew M, Denise F, Shaun H, *et al.* The global burden of asthma: executive summary of the GINA Dissemination Committee report. *Allergy* 2004;59(5):469-78.

17. Bobolea I, Arismendi E, Valero A, *et al.* Early life origins of asthma: A review of potential effectors. *J Investig Allergol Clin Immunol* 2019;29(3):168-79.

18. Haland G, Carlsen KC, Sandvik L, *et al.* Reduced lung function at birth and the risk of asthma at 10 years of age. *N Engl J Med* 2006;355(16):1682-9.

19. Harding R, Maritz G. Maternal and fetal origins of lung disease in adulthood. *Semin Fetal*

- 355 *Neonatal Med* 2012;17(2):67-72.
- 356 20. Postma DS, Bush A, van den Berge M. Risk factors and early origins of chronic obstructive  
357 pulmonary disease. *Lancet* 2015;385(9971):899-909.
- 358 21. Simpson CR, Sheikh A. Trends in the epidemiology of asthma in England: a national study  
359 of 333,294 patients. *J R Soc Med* 2010;103(3):98-106.
- 360 22. Liu X, Olsen J, Agerbo E, et al. Maternal preeclampsia and childhood asthma in the  
361 offspring. *Pediatr Allergy Immunol* 2015;26(2):181-5.
- 362 23. Byberg KK, Oglund B, Eide GE, et al. Birth after preeclamptic pregnancies: association  
363 with allergic sensitization and allergic rhinoconjunctivitis in late childhood; a historically  
364 matched cohort study. *BMC Pediatr* 2014;14:101-7.
- 365 24. Magee LA, Pels A, Helewa M, et al. Diagnosis, evaluation, and management of the  
366 hypertensive disorders of pregnancy: executive summary. *J Obstet Gynaecol Can*  
367 2014;36(5):416-41.
- 368 25. Lowe SA, Bowyer L, Lust K, et al. SOMANZ guidelines for the management of  
369 hypertensive disorders of pregnancy 2014. *Aust N Z J Obstet Gynaecol* 2015;55(5):e1-29.
- 370 26. Brown MA, Magee LA, Kenny LC, et al. Hypertensive Disorders of Pregnancy: ISSHP  
371 Classification, Diagnosis, and Management Recommendations for International Practice.  
372 *Hypertension* 2018;72(1):24-43.
- 373 27. Papadopoulos NG, Arakawa H, Carlsen KH, et al. International consensus on (ICON)  
374 pediatric asthma. *Allergy* 2012;67(8):976-97.
- 375 28. Moher D, Shamseer L, Clarke M, et al. Preferred reporting items for systematic review and  
376 meta-analysis protocols (PRISMA-P) 2015 statement. *Systematic reviews* 2015;4:1.

1  
2  
3  
4  
5  
6  
7  
8  
9  
10  
11  
12  
13  
14  
15  
16  
17  
18  
19  
20  
21  
22  
23  
24  
25  
26  
27  
28  
29  
30  
31  
32  
33  
34  
35  
36  
37  
38  
39  
40  
41  
42  
43  
44  
45  
46  
47  
48  
49  
50  
51  
52  
53  
54  
55  
56  
57  
58  
59  
60

29. Stroup DF, Berlin JA, Morton SC, *et al.* Meta-analysis of observational studies in epidemiology: a proposal for reporting. Meta-analysis Of Observational Studies in Epidemiology (MOOSE) group. *Jama* 2000;283(15):2008-12.

30. Andreas S. Critical evaluation of the Newcastle-Ottawa scale for the assessment of the quality of nonrandomized studies in meta-analyses. *European Journal of Epidemiology* 2010;25(9):603-5.

31. Rostom A, Dube C, Cranney A, *et al.* Celiac Disease. Rockville (MD): Agency for Healthcare Research and Quality (US); 2004 Sep. (Evidence Reports/Technology Assessments, No. 104.) Appendix D. Quality Assessment Forms, <http://www.ncbi.nlm.nih.gov/books/NBK35156>, (accessed 2004 ).

32. Angela KH, Meerpohl JJ, Gerald G, *et al.* GRADE guidelines: 14. Going from evidence to recommendations: the significance and presentation of recommendations. *Zeitschrift Fur Evidenz Fortbildung Und Qualitat Im Gesundheitswesen* 2013;66(7):719-25.

399 **Figure legends**

400 **Supplemental figure 1.** Flow Diagram of Studies Selected for Inclusion in the Systematic

401 Review (PRISMA 2009 Flow Diagram)

For peer review only

Supplemental figure 1. Flow Diagram of Studies Selected for Inclusion in the Systematic Review (PRISMA 2009 Flow Diagram)

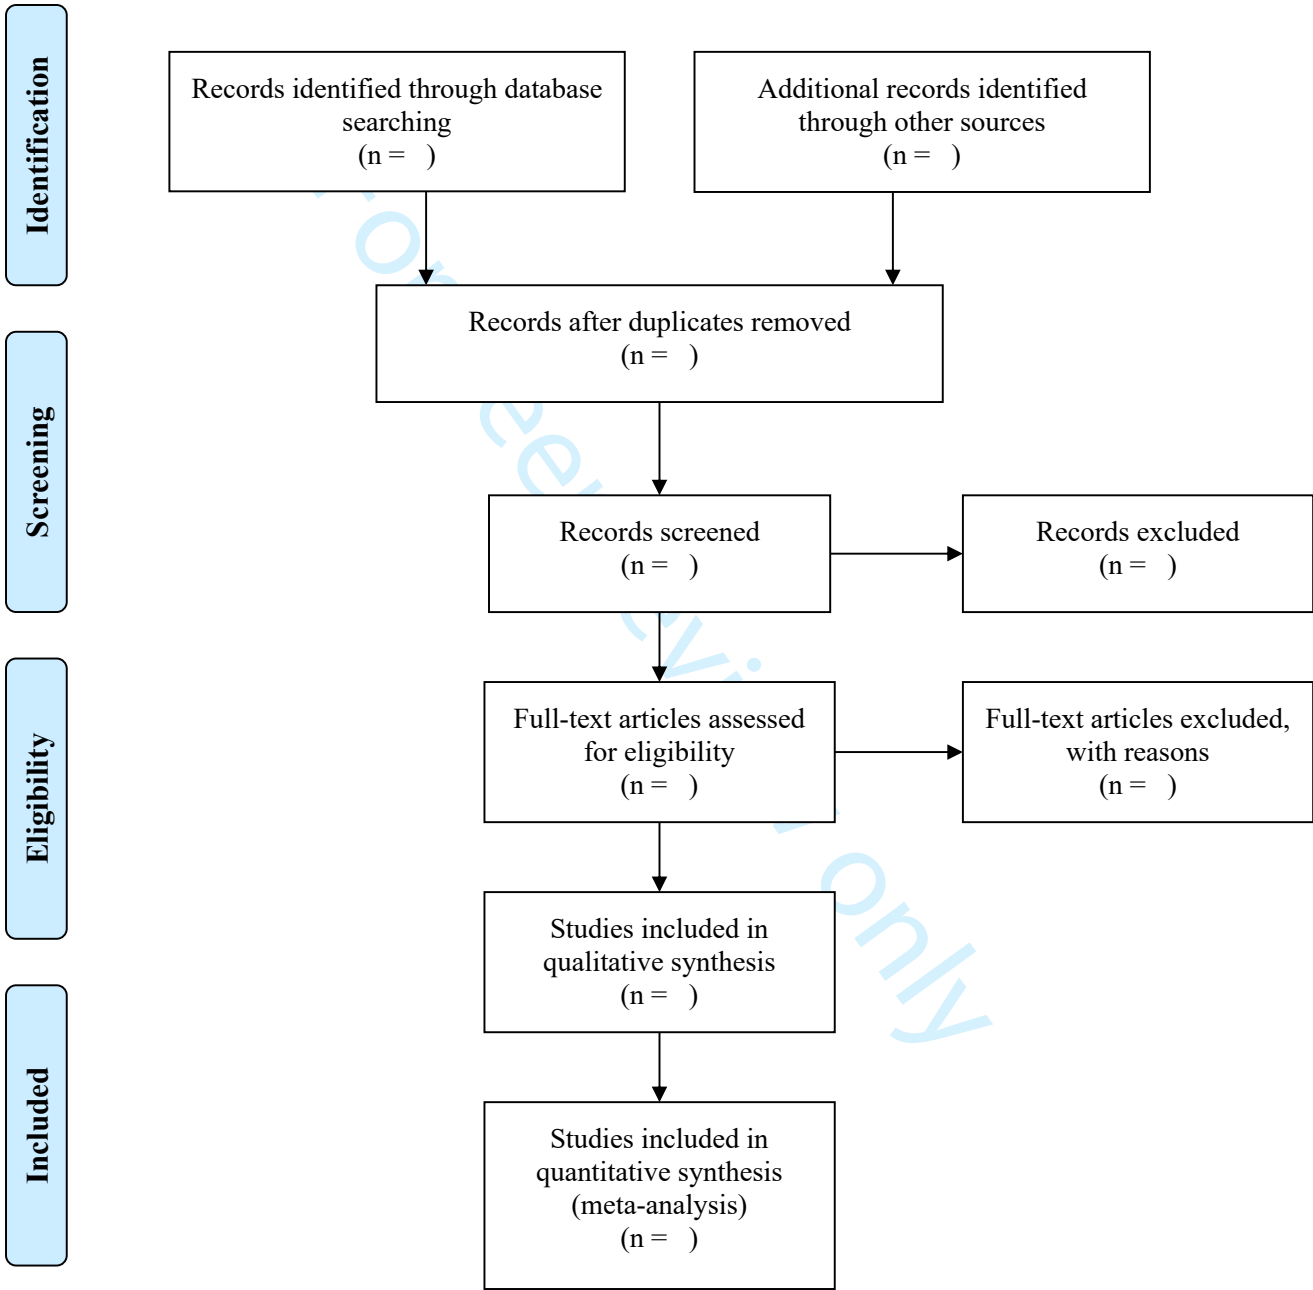

From: Moher D, Liberati A, Tetzlaff J, Altman DG, The PRISMA Group (2009). Preferred Reporting Items for Systematic Reviews and Meta-Analyses: The PRISMA Statement. PLoS Med 6(7): e1000097. doi:10.1371/journal.pmed1000097

For more information, visit [www.prisma-statement.org](http://www.prisma-statement.org).

**Supplemental table 1. Search strategy (for each electronic database to be searched)**

| #1 | Search terms                                                                            | No of records returned |
|----|-----------------------------------------------------------------------------------------|------------------------|
| 1  | hypertensive disorders during pregnancy                                                 |                        |
| 2  | hypertensive disorders in pregnancy                                                     |                        |
| 3  | hypertensive disorders of pregnancy                                                     |                        |
| 4  | pregnancy-induced hypertension                                                          |                        |
| 5  | eclampsia                                                                               |                        |
| 6  | pre-eclampsia                                                                           |                        |
| 7  | preeclampsia                                                                            |                        |
| 8  | preeclamptic pregnancy                                                                  |                        |
| 9  | chronic hypertension                                                                    |                        |
| 10 | gestational hypertension                                                                |                        |
| 11 | chronic hypertension with superimposed preeclampsia                                     |                        |
| 12 | postpartum hypertension                                                                 |                        |
| 13 | gravid hypertension                                                                     |                        |
| 14 | maternal hypertensive disorders                                                         |                        |
| 15 | (#1 OR #2 OR #3 OR #4 OR #5 OR #6 OR #7 OR #8 OR #9 OR #10 OR #11 OR #12 OR #13 OR #14) |                        |
| 16 | asthma                                                                                  |                        |
| 17 | wheeze                                                                                  |                        |
| 18 | wheezing                                                                                |                        |
| 19 | shortness of breath                                                                     |                        |
| 20 | bronchial spasm                                                                         |                        |
| 21 | bronchospasm                                                                            |                        |
| 22 | bronchoconstriction                                                                     |                        |
| 23 | bronchoconstrict                                                                        |                        |
| 24 | bronchial hyperreactivity                                                               |                        |
| 25 | bronchial hyperresponsiveness                                                           |                        |

|    |                                                                                                            |  |
|----|------------------------------------------------------------------------------------------------------------|--|
| 26 | reactive airway disease                                                                                    |  |
| 27 | obstructive lung disease                                                                                   |  |
| 28 | air low limitation                                                                                         |  |
| 29 | chronic obstructive respiratory disorder                                                                   |  |
| 30 | chronic obstructive pulmonary disease                                                                      |  |
| 31 | (#16 OR #17 OR #18 OR #19 OR #20 OR #21 OR #22 OR #23<br>OR #24 OR #25 OR #26 OR #27 OR #28 OR #29 OR #30) |  |
| 32 | (#15 AND #31)                                                                                              |  |
| 33 | limit #32 to English language                                                                              |  |
| 34 | limit #33 to humans                                                                                        |  |

**Supplemental table 2. Data Extraction Form for Review and meta-analysis**

| Study Details                              |                                                                   |
|--------------------------------------------|-------------------------------------------------------------------|
| <b>General information</b>                 |                                                                   |
| • First author                             |                                                                   |
| • Year of publication                      |                                                                   |
| • Study location                           |                                                                   |
| • Study duration                           |                                                                   |
| <b>Study eligibility</b>                   |                                                                   |
| • Study design (case-control, cohort)      |                                                                   |
| • Participants                             |                                                                   |
| exposed group                              |                                                                   |
| unexposed group                            |                                                                   |
| • Inclusion criteria                       |                                                                   |
| • Exclusion criteria                       |                                                                   |
| • Ascertainment of exposure                |                                                                   |
| • Outcome diagnostic criteria              |                                                                   |
| • Confounding variables                    |                                                                   |
| • Matching factors                         |                                                                   |
| Include or exclude                         | Include <input type="checkbox"/> exclude <input type="checkbox"/> |
| Reason for exclusion                       |                                                                   |
| <b>Characteristics of included studies</b> |                                                                   |
| • Sample size                              |                                                                   |
| exposed group (including subgroups)        |                                                                   |
| unexposed group                            |                                                                   |
| • Data source                              |                                                                   |
| • Race                                     |                                                                   |
| • Income level of country                  |                                                                   |
| • Maternal adjusted factors                |                                                                   |
| Maternal age, yrs                          |                                                                   |

|                                             |  |
|---------------------------------------------|--|
| Educational level                           |  |
| Maternal asthma                             |  |
| Maternal body mass index, kg/m <sup>2</sup> |  |
| Gestational weight gain, kg                 |  |
| Parity                                      |  |
| Maternal smoking                            |  |
| Others                                      |  |
| •Children`s adjusted factors                |  |
| Gender (M/F)                                |  |
| Birth weight, kg                            |  |
| Gestational age, w                          |  |
| Offspring age at diagnosis, yrs             |  |
| Others                                      |  |
| <b>Main outcome</b>                         |  |
| Effect estimates (RR or OR) with 95% CI     |  |
| Mean difference                             |  |
| Other findings                              |  |

**Other information**

|                                                       |                                       |
|-------------------------------------------------------|---------------------------------------|
|                                                       | Description as stated in report/paper |
| Key conclusions                                       |                                       |
| Study funding sources                                 |                                       |
| Conflicts of interest                                 |                                       |
| References to other relevant studies                  |                                       |
| Correspondence required for further study information |                                       |

### Supplemental table 3. Newcastle-Ottawa scale (NOS)

#### Supplemental table 3.1 Newcastle-Ottawa Scale (NOS) – for cohort study

| Study | Item & score                                 |                                         |                               |                                                                              |                                                                       |                           |                                                     |                                      |
|-------|----------------------------------------------|-----------------------------------------|-------------------------------|------------------------------------------------------------------------------|-----------------------------------------------------------------------|---------------------------|-----------------------------------------------------|--------------------------------------|
|       | Representativeness of the exposed cohort (1) | Selection of the non-exposed cohort (1) | Ascertainment of exposure (1) | Demonstration that outcome of interest was not present at start of study (1) | Compare ability of cohorts on the basis of the design or analysis (2) | Assessment of outcome (1) | Was follow up long enough for outcomes to occur (1) | Adequacy of follow up of cohorts (1) |
|       |                                              |                                         |                               |                                                                              |                                                                       |                           |                                                     |                                      |
|       |                                              |                                         |                               |                                                                              |                                                                       |                           |                                                     |                                      |
|       |                                              |                                         |                               |                                                                              |                                                                       |                           |                                                     |                                      |
|       |                                              |                                         |                               |                                                                              |                                                                       |                           |                                                     |                                      |
|       |                                              |                                         |                               |                                                                              |                                                                       |                           |                                                     |                                      |
|       |                                              |                                         |                               |                                                                              |                                                                       |                           |                                                     |                                      |

#### Supplemental table 3.2 Newcastle-Ottawa Scale (NOS) – for case-control study

| Study | Item & score                         |                                     |                           |                            |                                                                                |                               |                                                         |                       |
|-------|--------------------------------------|-------------------------------------|---------------------------|----------------------------|--------------------------------------------------------------------------------|-------------------------------|---------------------------------------------------------|-----------------------|
|       | Is the case definition adequate? (1) | Representativeness of the cases (1) | Selection of Controls (1) | Definition of Controls (1) | Comparability of cases and controls on the basis of the design or analysis (2) | Ascertainment of exposure (1) | Same method of ascertainment for cases and controls (1) | Non-Response rate (1) |
|       |                                      |                                     |                           |                            |                                                                                |                               |                                                         |                       |
|       |                                      |                                     |                           |                            |                                                                                |                               |                                                         |                       |
|       |                                      |                                     |                           |                            |                                                                                |                               |                                                         |                       |
|       |                                      |                                     |                           |                            |                                                                                |                               |                                                         |                       |
|       |                                      |                                     |                           |                            |                                                                                |                               |                                                         |                       |
|       |                                      |                                     |                           |                            |                                                                                |                               |                                                         |                       |

**Supplemental 3.3 NEWCASTLE - OTTAWA QUALITY ASSESSMENT SCALE  
COHORT STUDIES**

Note: A study can be awarded a maximum of one star for each numbered item within the Selection and Outcome categories. A maximum of two stars can be given for Comparability

**Selection**

- 1) Representativeness of the exposed cohort
  - a) truly representative of the average \_\_\_\_\_ (describe) in the community \*
  - b) somewhat representative of the average \_\_\_\_\_ in the community \*
  - c) selected group of users eg nurses, volunteers
  - d) no description of the derivation of the cohort
- 2) Selection of the non exposed cohort
  - a) drawn from the same community as the exposed cohort \*
  - b) drawn from a different source
  - c) no description of the derivation of the non exposed cohort
- 3) Ascertainment of exposure
  - a) secure record (eg surgical records) \*
  - b) structured interview \*
  - c) written self report
  - d) no description
- 4) Demonstration that outcome of interest was not present at start of study
  - a) yes \*
  - b) no

**Comparability**

- 1) Comparability of cohorts on the basis of the design or analysis
  - a) study controls for \_\_\_\_\_ (select the most important factor) \*
  - b) study controls for any additional factor \* (This criteria could be modified to indicate specific control for a second important factor.)

**Outcome**

- 1) Assessment of outcome
  - a) independent blind assessment \*
  - b) record linkage \*
  - c) self report
  - d) no description
- 2) Was follow-up long enough for outcomes to occur
  - a) yes (select an adequate follow up period for outcome of interest) \*
  - b) no
- 3) Adequacy of follow up of cohorts
  - a) complete follow up - all subjects accounted for \*
  - b) subjects lost to follow up unlikely to introduce bias - small number lost - > \_\_\_\_\_ % (select adequate %) follow up, or description provided of those lost) \*
  - c) follow up rate < \_\_\_\_\_ % (select an adequate %) and no description of those lost
  - d) no statement

### Supplemental 3.4 NEWCASTLE - OTTAWA QUALITY ASSESSMENT SCALE CASE CONTROL STUDIES

Note: A study can be awarded a maximum of one star for each numbered item within the Selection and Exposure categories. A maximum of two stars can be given for Comparability.

#### Selection

- 1) Is the case definition adequate?
  - a) yes, with independent validation \*
  - b) yes, eg record linkage or based on self reports
  - c) no description
- 2) Representativeness of the cases
  - a) consecutive or obviously representative series of cases \*
  - b) potential for selection biases or not stated
- 3) Selection of Controls
  - a) community controls \*
  - b) hospital controls
  - c) no description
- 4) Definition of Controls
  - a) no history of disease (endpoint) \*
  - b) no description of source

#### Comparability

- 1) Comparability of cases and controls on the basis of the design or analysis
  - a) study controls for \_\_\_\_\_ (Select the most important factor.) \*
  - b) study controls for any additional factor \* (This criteria could be modified to indicate specific control for a second important factor.)

#### Exposure

- 1) Ascertainment of exposure
  - a) secure record (eg surgical records) \*
  - b) structured interview where blind to case/control status \*
  - c) interview not blinded to case/control status
  - d) written self report or medical record only
  - e) no description
- 2) Same method of ascertainment for cases and controls
  - a) yes \*
  - b) no
- 3) Non-Response rate
  - a) same rate for both groups \*
  - b) non respondents described
  - c) rate different and no designation

**Supplemental table 4. Agency for Healthcare Research and Quality (AHQR) scale for cross-sectional study**

| Item                                                                                                                                | Yes | No | Unclear |
|-------------------------------------------------------------------------------------------------------------------------------------|-----|----|---------|
| 1) Define the source of information (survey, record review)                                                                         |     |    |         |
| 2) List inclusion and exclusion criteria for exposed and unexposed subjects (cases and controls) or refer to previous publications  |     |    |         |
| 3) Indicate time period used for identifying patients                                                                               |     |    |         |
| 4) Indicate whether or not subjects were consecutive if not population-based                                                        |     |    |         |
| 5) Indicate if evaluators of subjective components of study were masked to other aspects of the status of the participants          |     |    |         |
| 6) Describe any assessments undertaken for quality assurance purposes (e.g., test/retest of primary outcome measurements)           |     |    |         |
| 7) Explain any patient exclusions from analysis                                                                                     |     |    |         |
| 8) Describe how confounding was assessed and/or controlled                                                                          |     |    |         |
| 9) If applicable, explain how missing data were handled in the analysis                                                             |     |    |         |
| 10) Summarize patient response rates and completeness of data collection                                                            |     |    |         |
| 11) Clarify what follow-up, if any, was expected and the percentage of patients for which incomplete data or follow-up was obtained |     |    |         |

## Supplemental table 5. GRADE assessment

### Supplemental table 5.1 The Summary of Findings Tables

| Outcomes | No of Participants (studies)<br>Follow up | Quality of the evidence<br>(GRADE) | Relative effect (95%<br>CI) | Overall results |
|----------|-------------------------------------------|------------------------------------|-----------------------------|-----------------|
|          |                                           |                                    |                             |                 |
|          |                                           |                                    |                             |                 |
|          |                                           |                                    |                             |                 |
|          |                                           |                                    |                             |                 |

### Supplemental table 5.2 GRADE Evidence Profile

| Quality assessment |        |              |               |              |             |                      | No. of patients |          | Effect            | Quality |
|--------------------|--------|--------------|---------------|--------------|-------------|----------------------|-----------------|----------|-------------------|---------|
| No. of studies     | Design | Risk of bias | Inconsistency | Indirectness | Imprecision | Other considerations | HDP             | Controls | Relative (95% CI) |         |
| Outcome 1          |        |              |               |              |             |                      |                 |          |                   |         |
|                    |        |              |               |              |             |                      |                 |          |                   |         |
| Outcome 2          |        |              |               |              |             |                      |                 |          |                   |         |
|                    |        |              |               |              |             |                      |                 |          |                   |         |
| Outcome 3          |        |              |               |              |             |                      |                 |          |                   |         |
|                    |        |              |               |              |             |                      |                 |          |                   |         |

# Reporting checklist for protocol of a systematic review.

Based on the PRISMA-P guidelines.

## Instructions to authors

Complete this checklist by entering the page numbers from your manuscript where readers will find each of the items listed below.

Your article may not currently address all the items on the checklist. Please modify your text to include the missing information. If you are certain that an item does not apply, please write "n/a" and provide a short explanation.

Upload your completed checklist as an extra file when you submit to a journal.

In your methods section, say that you used the PRISMA-Preorting guidelines, and cite them as:

Moher D, Shamseer L, Clarke M, Ghersi D, Liberati A, Petticrew M, Shekelle P, Stewart LA. Preferred Reporting Items for Systematic Review and Meta-Analysis Protocols (PRISMA-P) 2015 statement. Syst Rev. 2015;4(1):1.

|                     |                     | Reporting Item                                                                                                                            | Page Number         |
|---------------------|---------------------|-------------------------------------------------------------------------------------------------------------------------------------------|---------------------|
| <b>Title</b>        |                     |                                                                                                                                           |                     |
| Identification      | <a href="#">#1a</a> | Identify the report as a protocol of a systematic review                                                                                  | 1                   |
| Update              | <a href="#">#1b</a> | If the protocol is for an update of a previous systematic review, identify as such                                                        | 2                   |
| <b>Registration</b> |                     |                                                                                                                                           |                     |
|                     | <a href="#">#2</a>  | If registered, provide the name of the registry (such as PROSPERO) and registration number                                                | n/a<br>under review |
| <b>Authors</b>      |                     |                                                                                                                                           |                     |
| Contact             | <a href="#">#3a</a> | Provide name, institutional affiliation, e-mail address of all protocol authors; provide physical mailing address of corresponding author | 1                   |
| Contribution        | <a href="#">#3b</a> | Describe contributions of protocol authors and identify the guarantor of the review                                                       | 16                  |

## Amendments

|                    |                                                                                                                                                                                                 |   |
|--------------------|-------------------------------------------------------------------------------------------------------------------------------------------------------------------------------------------------|---|
| <a href="#">#4</a> | If the protocol represents an amendment of a previously completed or published protocol, identify as such and list changes; otherwise, state plan for documenting important protocol amendments | 2 |
|--------------------|-------------------------------------------------------------------------------------------------------------------------------------------------------------------------------------------------|---|

## Support

|                           |                     |                                                                                                      |   |
|---------------------------|---------------------|------------------------------------------------------------------------------------------------------|---|
| Sources                   | <a href="#">#5a</a> | Indicate sources of financial or other support for the review                                        | 1 |
| Sponsor                   | <a href="#">#5b</a> | Provide name for the review funder and / or sponsor                                                  | 1 |
| Role of sponsor or funder | <a href="#">#5c</a> | Describe roles of funder(s), sponsor(s), and / or institution(s), if any, in developing the protocol | 1 |

## Introduction

|            |                    |                                                                                                                                                          |     |
|------------|--------------------|----------------------------------------------------------------------------------------------------------------------------------------------------------|-----|
| Rationale  | <a href="#">#6</a> | Describe the rationale for the review in the context of what is already known                                                                            | 5-6 |
| Objectives | <a href="#">#7</a> | Provide an explicit statement of the question(s) the review will address with reference to participants, interventions, comparators, and outcomes (PICO) | 7   |

## Methods

|                                   |                      |                                                                                                                                                                                                                               |       |
|-----------------------------------|----------------------|-------------------------------------------------------------------------------------------------------------------------------------------------------------------------------------------------------------------------------|-------|
| Eligibility criteria              | <a href="#">#8</a>   | Specify the study characteristics (such as PICO, study design, setting, time frame) and report characteristics (such as years considered, language, publication status) to be used as criteria for eligibility for the review | 11-12 |
| Information sources               | <a href="#">#9</a>   | Describe all intended information sources (such as electronic databases, contact with study authors, trial registers or other grey literature sources) with planned dates of coverage                                         | 10-11 |
| Search strategy                   | <a href="#">#10</a>  | Present draft of search strategy to be used for at least one electronic database, including planned limits, such that it could be repeated                                                                                    | 10-11 |
| Study records - data management   | <a href="#">#11a</a> | Describe the mechanism(s) that will be used to manage records and data throughout the review                                                                                                                                  | 11    |
| Study records - selection process | <a href="#">#11b</a> | State the process that will be used for selecting studies (such as two independent reviewers) through each phase of the review                                                                                                | 11-12 |

(that is, screening, eligibility and inclusion in meta-analysis)

|                                         |                      |                                                                                                                                                                                                                                                           |       |
|-----------------------------------------|----------------------|-----------------------------------------------------------------------------------------------------------------------------------------------------------------------------------------------------------------------------------------------------------|-------|
| Study records - data collection process | <a href="#">#11c</a> | Describe planned method of extracting data from reports (such as piloting forms, done independently, in duplicate), any processes for obtaining and confirming data from investigators                                                                    | 11-12 |
| Data items                              | <a href="#">#12</a>  | List and define all variables for which data will be sought (such as PICO items, funding sources), any pre-planned data assumptions and simplifications                                                                                                   | 11-12 |
| Outcomes and prioritization             | <a href="#">#13</a>  | List and define all outcomes for which data will be sought, including prioritization of main and additional outcomes, with rationale                                                                                                                      | 8-9   |
| Risk of bias in individual studies      | <a href="#">#14</a>  | Describe anticipated methods for assessing risk of bias of individual studies, including whether this will be done at the outcome or study level, or both; state how this information will be used in data synthesis                                      | 12-13 |
| Data synthesis                          | <a href="#">#15a</a> | Describe criteria under which study data will be quantitatively synthesised                                                                                                                                                                               | 13-14 |
| Data synthesis                          | <a href="#">#15b</a> | If data are appropriate for quantitative synthesis, describe planned summary measures, methods of handling data and methods of combining data from studies, including any planned exploration of consistency (such as I <sup>2</sup> , Kendall's $\tau$ ) | 13-14 |
| Data synthesis                          | <a href="#">#15c</a> | Describe any proposed additional analyses (such as sensitivity or subgroup analyses, meta-regression)                                                                                                                                                     | 12    |
| Data synthesis                          | <a href="#">#15d</a> | If quantitative synthesis is not appropriate, describe the type of summary planned                                                                                                                                                                        | 14    |
| Meta-bias(es)                           | <a href="#">#16</a>  | Specify any planned assessment of meta-bias(es) (such as publication bias across studies, selective reporting within studies)                                                                                                                             | 13    |
| Confidence in cumulative evidence       | <a href="#">#17</a>  | Describe how the strength of the body of evidence will be assessed (such as GRADE)                                                                                                                                                                        | 14    |

None The PRISMA-P checklist is distributed under the terms of the Creative Commons Attribution License CC-BY 4.0. This checklist can be completed online using <https://www.goodreports.org/>, a tool made by the EQUATOR Network in collaboration with [Penelope.ai](#)
