# Supplementary material for: Hypertensive disorders of pregnancy and risk of asthma in offspring: protocol for a systematic review and meta-analysis
Source: PubMed Central journal article supplement — BMJ Open. 2020 Apr 9;10(4):e035145. doi: 10.1136/bmjopen-2019-035145 (PMC7170635; doi:10.1136/bmjopen-2019-035145), 2020-04-09
Supplement: bmjopen-2019-035145supp001.pdf [file bmjopen-2019-035145supp001.pdf]

**Supplemental figure 1. Flow Diagram of Studies Selected for Inclusion in the Systematic Review (PRISMA 2009 Flow Diagram)**

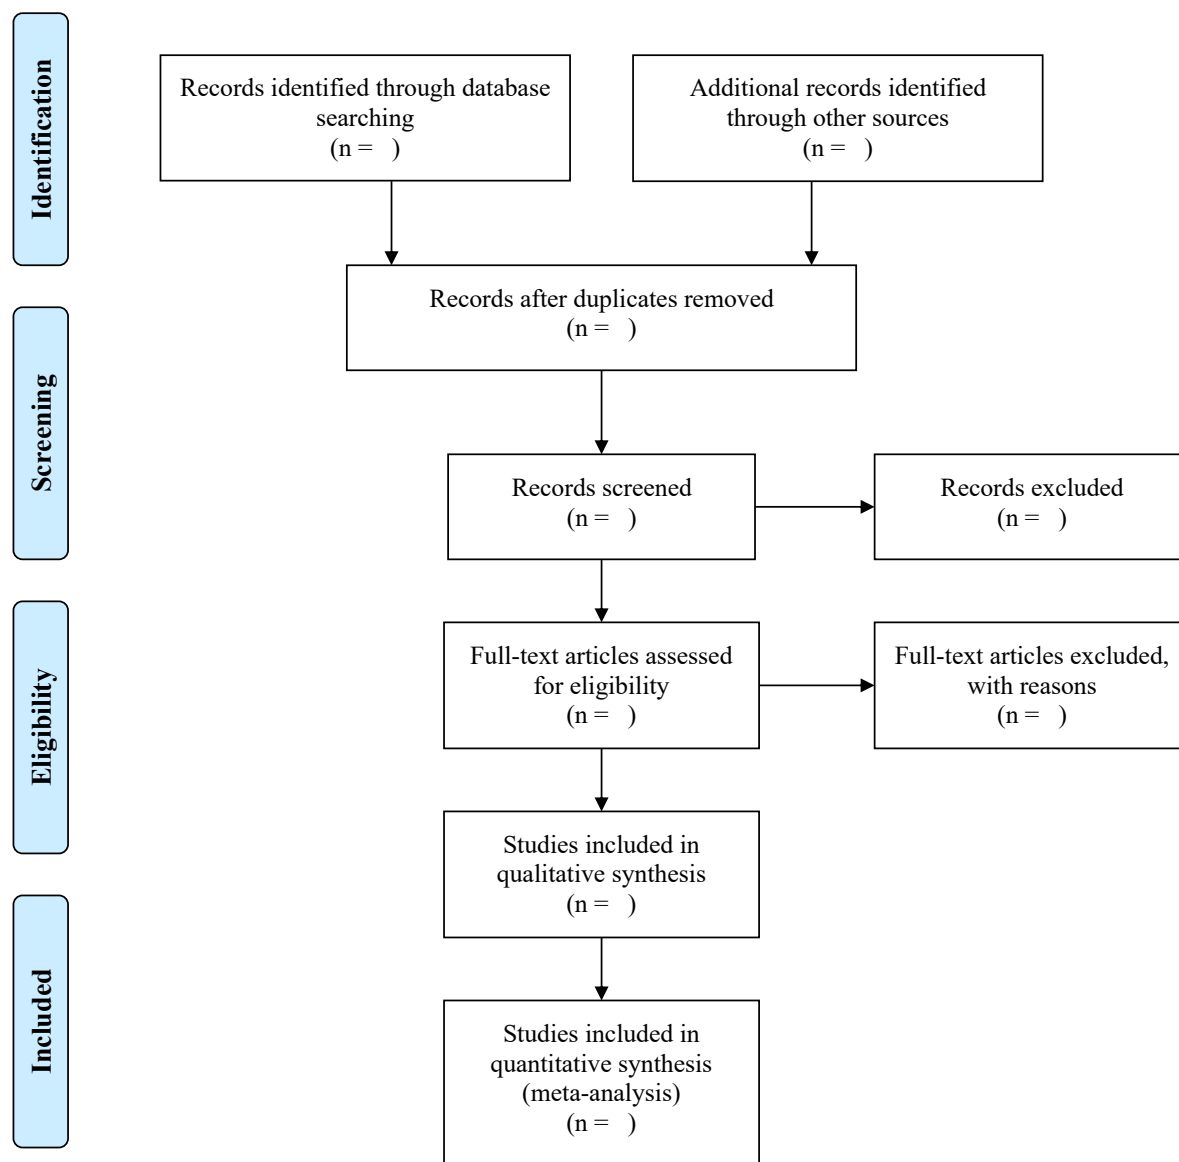

From: Moher D, Liberati A, Tetzlaff J, Altman DG, The PRISMA Group (2009). Preferred Reporting Items for Systematic Reviews and Meta-Analyses: The PRISMA Statement. PLoS Med 6(7): e1000097. doi:10.1371/journal.pmed1000097

For more information, visit [www.prisma-statement.org](http://www.prisma-statement.org).
