# Supplementary material for: Hypertensive disorders of pregnancy and risk of asthma in offspring: protocol for a systematic review and meta-analysis
Source: PubMed Central journal article supplement — BMJ Open. 2020 Apr 9;10(4):e035145. doi: 10.1136/bmjopen-2019-035145 (PMC7170635; doi:10.1136/bmjopen-2019-035145), 2020-04-09
Supplement: bmjopen-2019-035145supp002.pdf [file bmjopen-2019-035145supp002.pdf]

**Supplemental table 1. Search strategy (for each electronic database to be searched)**

| #1 | Search terms                                                                            | No of records returned |
|----|-----------------------------------------------------------------------------------------|------------------------|
| 1  | hypertensive disorders during pregnancy                                                 |                        |
| 2  | hypertensive disorders in pregnancy                                                     |                        |
| 3  | hypertensive disorders of pregnancy                                                     |                        |
| 4  | pregnancy-induced hypertension                                                          |                        |
| 5  | eclampsia                                                                               |                        |
| 6  | pre-eclampsia                                                                           |                        |
| 7  | preeclampsia                                                                            |                        |
| 8  | preeclamptic pregnancy                                                                  |                        |
| 9  | chronic hypertension                                                                    |                        |
| 10 | gestational hypertension                                                                |                        |
| 11 | chronic hypertension with superimposed preeclampsia                                     |                        |
| 12 | postpartum hypertension                                                                 |                        |
| 13 | gravid hypertension                                                                     |                        |
| 14 | maternal hypertensive disorders                                                         |                        |
| 15 | (#1 OR #2 OR #3 OR #4 OR #5 OR #6 OR #7 OR #8 OR #9 OR #10 OR #11 OR #12 OR #13 OR #14) |                        |
| 16 | asthma                                                                                  |                        |
| 17 | wheeze                                                                                  |                        |
| 18 | wheezing                                                                                |                        |
| 19 | shortness of breath                                                                     |                        |
| 20 | bronchial spasm                                                                         |                        |
| 21 | bronchospasm                                                                            |                        |
| 22 | bronchoconstriction                                                                     |                        |
| 23 | bronchoconstrict                                                                        |                        |
| 24 | bronchial hyperreactivity                                                               |                        |
| 25 | bronchial hyperresponsiveness                                                           |                        |

|    |                                                                                                            |  |
|----|------------------------------------------------------------------------------------------------------------|--|
| 26 | reactive airway disease                                                                                    |  |
| 27 | obstructive lung disease                                                                                   |  |
| 28 | air low limitation                                                                                         |  |
| 29 | chronic obstructive respiratory disorder                                                                   |  |
| 30 | chronic obstructive pulmonary disease                                                                      |  |
| 31 | (#16 OR #17 OR #18 OR #19 OR #20 OR #21 OR #22 OR #23<br>OR #24 OR #25 OR #26 OR #27 OR #28 OR #29 OR #30) |  |
| 32 | (#15 AND #31)                                                                                              |  |
| 33 | limit #32 to English language                                                                              |  |
| 34 | limit #33 to humans                                                                                        |  |
