# Supplementary material for: Hypertensive disorders of pregnancy and risk of asthma in offspring: protocol for a systematic review and meta-analysis
Source: PubMed Central journal article supplement — BMJ Open. 2020 Apr 9;10(4):e035145. doi: 10.1136/bmjopen-2019-035145 (PMC7170635; doi:10.1136/bmjopen-2019-035145), 2020-04-09
Supplement: bmjopen-2019-035145supp003.pdf [file bmjopen-2019-035145supp003.pdf]

**Supplemental table 2. Data Extraction Form for Review and meta-analysis**

| <b>Study Details</b>                       |                                                                   |
|--------------------------------------------|-------------------------------------------------------------------|
| <b>General information</b>                 |                                                                   |
| • First author                             |                                                                   |
| • Year of publication                      |                                                                   |
| • Study location                           |                                                                   |
| • Study duration                           |                                                                   |
| <b>Study eligibility</b>                   |                                                                   |
| • Study design (case-control, cohort)      |                                                                   |
| • Participants                             |                                                                   |
| exposed group                              |                                                                   |
| unexposed group                            |                                                                   |
| • Inclusion criteria                       |                                                                   |
| • Exclusion criteria                       |                                                                   |
| • Ascertainment of exposure                |                                                                   |
| • Outcome diagnostic criteria              |                                                                   |
| • Confounding variables                    |                                                                   |
| • Matching factors                         |                                                                   |
| Include or exclude                         | Include <input type="checkbox"/> exclude <input type="checkbox"/> |
| Reason for exclusion                       |                                                                   |
| <b>Characteristics of included studies</b> |                                                                   |
| • Sample size                              |                                                                   |
| exposed group (including subgroups)        |                                                                   |
| unexposed group                            |                                                                   |
| • Data source                              |                                                                   |
| • Race                                     |                                                                   |
| • Income level of country                  |                                                                   |
| • Maternal adjusted factors                |                                                                   |
| Maternal age, yrs                          |                                                                   |

|                                             |  |
|---------------------------------------------|--|
| Educational level                           |  |
| Maternal asthma                             |  |
| Maternal body mass index, kg/m <sup>2</sup> |  |
| Gestational weight gain, kg                 |  |
| Parity                                      |  |
| Maternal smoking                            |  |
| Others                                      |  |
| • Children`s adjusted factors               |  |
| Gender (M/F)                                |  |
| Birth weight, kg                            |  |
| Gestational age, w                          |  |
| Offspring age at diagnosis, yrs             |  |
| Others                                      |  |
| <b>Main outcome</b>                         |  |
| Effect estimates (RR or OR) with 95% CI     |  |
| Mean difference                             |  |
| Other findings                              |  |

### Other information

|                                                       | Description as stated in report/paper |
|-------------------------------------------------------|---------------------------------------|
| Key conclusions                                       |                                       |
| Study funding sources                                 |                                       |
| Conflicts of interest                                 |                                       |
| References to other relevant studies                  |                                       |
| Correspondence required for further study information |                                       |
