# Supplementary material for: Hypertensive disorders of pregnancy and risk of asthma in offspring: protocol for a systematic review and meta-analysis
Source: PubMed Central journal article supplement — BMJ Open. 2020 Apr 9;10(4):e035145. doi: 10.1136/bmjopen-2019-035145 (PMC7170635; doi:10.1136/bmjopen-2019-035145), 2020-04-09
Supplement: bmjopen-2019-035145supp004.pdf [file bmjopen-2019-035145supp004.pdf]

### Supplemental table 3. Newcastle-Ottawa scale (NOS)

#### Supplemental table 3.1 Newcastle-Ottawa Scale (NOS) – for cohort study

| Study | Item & score                                 |                                         |                               |                                                                              |                                                                       |                           |                                                     |                                      |
|-------|----------------------------------------------|-----------------------------------------|-------------------------------|------------------------------------------------------------------------------|-----------------------------------------------------------------------|---------------------------|-----------------------------------------------------|--------------------------------------|
|       | Representativeness of the exposed cohort (1) | Selection of the non-exposed cohort (1) | Ascertainment of exposure (1) | Demonstration that outcome of interest was not present at start of study (1) | Compare ability of cohorts on the basis of the design or analysis (2) | Assessment of outcome (1) | Was follow up long enough for outcomes to occur (1) | Adequacy of follow up of cohorts (1) |
|       |                                              |                                         |                               |                                                                              |                                                                       |                           |                                                     |                                      |
|       |                                              |                                         |                               |                                                                              |                                                                       |                           |                                                     |                                      |
|       |                                              |                                         |                               |                                                                              |                                                                       |                           |                                                     |                                      |
|       |                                              |                                         |                               |                                                                              |                                                                       |                           |                                                     |                                      |
|       |                                              |                                         |                               |                                                                              |                                                                       |                           |                                                     |                                      |
|       |                                              |                                         |                               |                                                                              |                                                                       |                           |                                                     |                                      |

#### Supplemental table 3.2 Newcastle-Ottawa Scale (NOS) – for case-control study

| Study | Item & score                         |                                     |                           |                            |                                                                                |                               |                                                         |                       |
|-------|--------------------------------------|-------------------------------------|---------------------------|----------------------------|--------------------------------------------------------------------------------|-------------------------------|---------------------------------------------------------|-----------------------|
|       | Is the case definition adequate? (1) | Representativeness of the cases (1) | Selection of Controls (1) | Definition of Controls (1) | Comparability of cases and controls on the basis of the design or analysis (2) | Ascertainment of exposure (1) | Same method of ascertainment for cases and controls (1) | Non-Response rate (1) |
|       |                                      |                                     |                           |                            |                                                                                |                               |                                                         |                       |
|       |                                      |                                     |                           |                            |                                                                                |                               |                                                         |                       |
|       |                                      |                                     |                           |                            |                                                                                |                               |                                                         |                       |
|       |                                      |                                     |                           |                            |                                                                                |                               |                                                         |                       |
|       |                                      |                                     |                           |                            |                                                                                |                               |                                                         |                       |
|       |                                      |                                     |                           |                            |                                                                                |                               |                                                         |                       |

### Supplemental 3.3 NEWCASTLE - OTTAWA QUALITY ASSESSMENT SCALE COHORT STUDIES

Note: A study can be awarded a maximum of one star for each numbered item within the Selection and Outcome categories. A maximum of two stars can be given for Comparability

#### Selection

- 1) Representativeness of the exposed cohort
  - a) truly representative of the average \_\_\_\_\_ (describe) in the community \*
  - b) somewhat representative of the average \_\_\_\_\_ in the community \*
  - c) selected group of users eg nurses, volunteers
  - d) no description of the derivation of the cohort
- 2) Selection of the non exposed cohort
  - a) drawn from the same community as the exposed cohort \*
  - b) drawn from a different source
  - c) no description of the derivation of the non exposed cohort
- 3) Ascertainment of exposure
  - a) secure record (eg surgical records) \*
  - b) structured interview \*
  - c) written self report
  - d) no description
- 4) Demonstration that outcome of interest was not present at start of study
  - a) yes \*
  - b) no

#### Comparability

- 1) Comparability of cohorts on the basis of the design or analysis
  - a) study controls for \_\_\_\_\_ (select the most important factor) \*
  - b) study controls for any additional factor \* (This criteria could be modified to indicate specific \_\_\_\_\_ control for a second important factor.)

#### Outcome

- 1) Assessment of outcome
  - a) independent blind assessment \*
  - b) record linkage \*
  - c) self report
  - d) no description
- 2) Was follow-up long enough for outcomes to occur
  - a) yes (select an adequate follow up period for outcome of interest) \*
  - b) no
- 3) Adequacy of follow up of cohorts
  - a) complete follow up - all subjects accounted for \*
  - b) subjects lost to follow up unlikely to introduce bias - small number lost - > \_\_\_\_ % (select an adequate % follow up, or description provided of those lost) \*
  - c) follow up rate < \_\_\_\_ % (select an adequate %) and no description of those lost
  - d) no statement

### Supplemental 3.4 NEWCASTLE - OTTAWA QUALITY ASSESSMENT SCALE CASE CONTROL STUDIES

Note: A study can be awarded a maximum of one star for each numbered item within the Selection and Exposure categories. A maximum of two stars can be given for Comparability.

#### Selection

- 1) Is the case definition adequate?
  - a) yes, with independent validation \*
  - b) yes, eg record linkage or based on self reports
  - c) no description
- 2) Representativeness of the cases
  - a) consecutive or obviously representative series of cases \*
  - b) potential for selection biases or not stated
- 3) Selection of Controls
  - a) community controls \*
  - b) hospital controls
  - c) no description
- 4) Definition of Controls
  - a) no history of disease (endpoint) \*
  - b) no description of source

#### Comparability

- 1) Comparability of cases and controls on the basis of the design or analysis
  - a) study controls for \_\_\_\_\_ (Select the most important factor.) \*
  - b) study controls for any additional factor \* (This criteria could be modified to indicate specific control for a second important factor.)

#### Exposure

- 1) Ascertainment of exposure
  - a) secure record (eg surgical records) \*
  - b) structured interview where blind to case/control status \*
  - c) interview not blinded to case/control status
  - d) written self report or medical record only
  - e) no description
- 2) Same method of ascertainment for cases and controls
  - a) yes \*
  - b) no
- 3) Non-Response rate
  - a) same rate for both groups \*
  - b) non respondents described
  - c) rate different and no designation
