# Supplementary material for: Hypertensive disorders of pregnancy and risk of asthma in offspring: protocol for a systematic review and meta-analysis
Source: PubMed Central journal article supplement — BMJ Open. 2020 Apr 9;10(4):e035145. doi: 10.1136/bmjopen-2019-035145 (PMC7170635; doi:10.1136/bmjopen-2019-035145), 2020-04-09
Supplement: bmjopen-2019-035145supp005.pdf [file bmjopen-2019-035145supp005.pdf]

### Supplemental table 4. Agency for Healthcare Research and Quality

#### (AHQR) scale for cross-sectional study

| Item                                                                                                                                | Yes | No | Unclear |
|-------------------------------------------------------------------------------------------------------------------------------------|-----|----|---------|
| 1) Define the source of information (survey, record review)                                                                         |     |    |         |
| 2) List inclusion and exclusion criteria for exposed and unexposed subjects (cases and controls) or refer to previous publications  |     |    |         |
| 3) Indicate time period used for identifying patients                                                                               |     |    |         |
| 4) Indicate whether or not subjects were consecutive if not population-based                                                        |     |    |         |
| 5) Indicate if evaluators of subjective components of study were masked to other aspects of the status of the participants          |     |    |         |
| 6) Describe any assessments undertaken for quality assurance purposes (e.g., test/retest of primary outcome measurements)           |     |    |         |
| 7) Explain any patient exclusions from analysis                                                                                     |     |    |         |
| 8) Describe how confounding was assessed and/or controlled                                                                          |     |    |         |
| 9) If applicable, explain how missing data were handled in the analysis                                                             |     |    |         |
| 10) Summarize patient response rates and completeness of data collection                                                            |     |    |         |
| 11) Clarify what follow-up, if any, was expected and the percentage of patients for which incomplete data or follow-up was obtained |     |    |         |
