# Supplementary material for: Hypertensive disorders of pregnancy and risk of asthma in offspring: protocol for a systematic review and meta-analysis
Source: PubMed Central journal article supplement — BMJ Open. 2020 Apr 9;10(4):e035145. doi: 10.1136/bmjopen-2019-035145 (PMC7170635; doi:10.1136/bmjopen-2019-035145), 2020-04-09
Supplement: bmjopen-2019-035145supp006.pdf [file bmjopen-2019-035145supp006.pdf]

## Supplemental table 5. GRADE assessment

### Supplemental table 5.1 The Summary of Findings Tables

| Outcomes | No of Participants (studies)<br>Follow up | Quality of the evidence<br>(GRADE) | Relative effect (95%<br>CI) | Overall results |
|----------|-------------------------------------------|------------------------------------|-----------------------------|-----------------|
|          |                                           |                                    |                             |                 |
|          |                                           |                                    |                             |                 |
|          |                                           |                                    |                             |                 |

### Supplemental table 5.2 GRADE Evidence Profile

| Quality assessment |        |              |               |              |             |                      | No. of patients |          | Effect            | Quality |
|--------------------|--------|--------------|---------------|--------------|-------------|----------------------|-----------------|----------|-------------------|---------|
| No. of studies     | Design | Risk of bias | Inconsistency | Indirectness | Imprecision | Other considerations | HDP             | Controls | Relative (95% CI) |         |
| Outcome 1          |        |              |               |              |             |                      |                 |          |                   |         |
|                    |        |              |               |              |             |                      |                 |          |                   |         |
| Outcome 2          |        |              |               |              |             |                      |                 |          |                   |         |
|                    |        |              |               |              |             |                      |                 |          |                   |         |
| Outcome 3          |        |              |               |              |             |                      |                 |          |                   |         |
|                    |        |              |               |              |             |                      |                 |          |                   |         |
